# Supplementary material for: A High-Throughput UHPLC-QqQ-MS Method for Polyphenol Profiling in Rosé Wines
Source: PubMed Central journal article supplement (PMC6272418; doi:10.3390/molecules20057890), 2015-04-30
Supplement: molecules-20-07890-s001.pdf [file molecules-20-07890-s001.pdf]

# Supplementary Materials

**Table S1.** Measured polyphenol concentration (Conc.) and calculated Limit Of Quantification (LOQ) in the 12 rosé wines (n.d.: not detected).

|                                       |                                                | 1                           |                           | 2                           |                           | 3                           |                           | 4                           |                           |
|---------------------------------------|------------------------------------------------|-----------------------------|---------------------------|-----------------------------|---------------------------|-----------------------------|---------------------------|-----------------------------|---------------------------|
|                                       |                                                | Conc. (mg·L <sup>-1</sup> ) | LOQ (mg·L <sup>-1</sup> ) | Conc. (mg·L <sup>-1</sup> ) | LOQ (mg·L <sup>-1</sup> ) | Conc. (mg·L <sup>-1</sup> ) | LOQ (mg·L <sup>-1</sup> ) | Conc. (mg·L <sup>-1</sup> ) | LOQ (mg·L <sup>-1</sup> ) |
| Benzoic acids and derivatives         | <i>Gallic acid</i>                             | 10.53 ± 0.09                | 0.08                      | 0.427 ± 0.009               | 0.2                       | 1.34 ± 0.02                 | 0.2                       | 3.5 ± 0.1                   | 0.08                      |
|                                       | <i>Protocatechuic acid</i>                     | 2.46 ± 0.02                 | 0.07                      | 0.54 ± 0.02                 | 0.02                      | 0.572 ± 0.006               | 0.03                      | 1.51 ± 0.03                 | 0.04                      |
|                                       | <i>Syringic acid</i>                           | 1.68 ± 0.06                 | 0.07                      | 1.11 ± 0.05                 | 0.03                      | 0.327 ± 0.008               | 0.03                      | 0.63 ± 0.03                 | 0.04                      |
|                                       | <i>Vanillic acid</i>                           | 1.5 ± 0.2                   | 0.3                       | 1.1 ± 0.3                   | 0.3                       | 0.37 ± 0.06                 | 0.3                       | 0.86 ± 0.05                 | 0.2                       |
|                                       | <i>Ethyl gallate</i>                           | 0.9 ± 0.3                   | 0.005                     | 0.06 ± 0.03                 | 0.05                      | 0.18 ± 0.06                 | 0.005                     | 0.4 ± 0.2                   | 0.007                     |
|                                       | <i>Ethyl protocatechuate</i>                   | 0.12 ± 0.1                  | <0.02                     | 0.06 ± 0.05                 | <0.02                     | 0.03 ± 0.02                 | 0.02                      | 0.21 ± 0.1                  | <0.02                     |
| Hydroxycinnamic acids and derivatives | <i>Caffeic acid</i>                            | 2.88 ± 0.03                 | 0.2                       | 0.69 ± 0.02                 | 0.07                      | 3.4 ± 0.2                   | 0.05                      | 10.5 ± 0.8                  | 0.06                      |
|                                       | <i>p-coumaric acid</i>                         | 1.3 ± 0.3                   | 0.5                       | 0.3 ± 0.2                   | 0.5                       | 0.8 ± 0.2                   | 0.3                       | 4.1 ± 0.7                   | 0.3                       |
|                                       | <i>Ferulic acid</i>                            | 0.4 ± 0.2                   | 0.05                      | 0.1 ± 0.2                   | 0.2                       | 0.2 ± 0.2                   | 0.2                       | 0.9 ± 0.3                   | 0.4                       |
|                                       | <i>Caftaric acid (cis- and trans- isomers)</i> | 40.6 ± 0.6                  | 0.3                       | 4.97 ± 0.1                  | 0.5                       | 53.6 ± 0.4                  | 0.3                       | 5.74 ± 0.06                 | 0.4                       |
|                                       | <i>Coutaric acid (cis- and trans- isomers)</i> | 20.5 ± 0.6                  | 0.02                      | 2.9 ± 0.4                   | 0.02                      | 12.2 ± 0.5                  | 0.06                      | 3 ± 2                       | 0.02                      |
|                                       | <i>Fertaric acid</i>                           | 4.4 ± 0.2                   | 0.02                      | 3.91 ± 0.08                 | 0.01                      | 9.7 ± 0.5                   | 0.004                     | 6.5 ± 0.4                   | 0.003                     |
|                                       | <i>GRP (cis- and trans- isomers)</i>           | 6.9 ± 0.3                   | 0.2                       | 10.1 ± 0.2                  | 0.08                      | 23 ± 3                      | 0.06                      | 10 ± 2                      | 0.04                      |
|                                       | <i>Ethyl caffeate</i>                          | 0.14 ± 0.07                 | 0.008                     | 0.11 ± 0.02                 | 0.009                     | 1.4 ± 0.3                   | 0.008                     | 6.2 ± 0.3                   | 0.07                      |
| <i>Ethyl coumarate</i>                | 0.08 ± 0.08                                    | 0.01                        | 0.014 ± 0.005             | 0.005                       | 0.23 ± 0.09               | 0.007                       | 0.67 ± 0.1                | 0.008                       |                           |
| Stilbens                              | <i>trans-resveratrol</i>                       | 0.133 ± 0.005               | 0.05                      | 0.185 ± 0.002               | 0.02                      | 0.085 ± 0.009               | 0.02                      | 0.22 ± 0.04                 | 0.04                      |
|                                       | <i>cis-resveratrol</i>                         | 0.059 ± 0.008               | 0.02                      | 0.034 ± 0.005               | 0.02                      | 0.046 ± 0.007               | 0.02                      | 0.186 ± 0.009               | 0.03                      |
|                                       | <i>viniferin-1</i>                             | 0.24 ± 0.09                 | 0.4                       | 0.09 ± 0.04                 | 0.3                       | 0.08 ± 0.05                 | 0.2                       | 0.11 ± 0.05                 | 0.2                       |
|                                       | <i>viniferin-2</i>                             | 0.01 ± 0.02                 | 0.02                      | 0.029 ± 0.002               | 0.05                      | 0.018 ± 0.003               | 0.02                      | 0.021 ± 0.005               | 0.04                      |
|                                       | <i>trans-piceid</i>                            | 1.41 ± 0.09                 | 0.5                       | 0.9 ± 0.2                   | 0.7                       | 0.23 ± 0.05                 | 0.4                       | 0.4 ± 0.04                  | 0.3                       |
|                                       | <i>cis-piceid</i>                              | 0.59 ± 0.06                 | 0.3                       | 1.3 ± 0.2                   | 0.09                      | 0.57 ± 0.04                 | 0.06                      | 1.25 ± 0.04                 | 0.3                       |
| Flavonols                             | <i>Quercetin Glc</i>                           | 0.017 ± 0.003               | 0.03                      | 0.013 ± 0.002               | 0.02                      | 0.008 ± 0.005               | 0.02                      | 0.004 ± 0.004               | 0.01                      |
|                                       | <i>Myricetin glucuronide</i>                   | 0.12 ± 0.04                 | 2                         | 0.004 ± 0.002               | 0.2                       | 0.003 ± 0.003               | 0.2                       | 0.021 ± 0.006               | 0.6                       |
|                                       | <i>Myricetin Glc</i>                           | 0.19 ± 0.02                 | 0.007                     | 0.012 ± 0.003               | 0.004                     | 0.01 ± 0.002                | 0.002                     | 0.051 ± 0.007               | 0.004                     |
|                                       | <i>Quercetin glucuronide</i>                   | 0.44 ± 0.03                 | 0.006                     | 0.12 ± 0.03                 | 0.002                     | 0.26 ± 0.07                 | 0.004                     | 0.31 ± 0.03                 | 0.005                     |
|                                       | <i>Quercetin</i>                               | n.d.                        | 0.2                       | 0.01 ± 0.02                 | 0.2                       | 0.01 ± 0.02                 | 0.02                      | 0.005 ± 0.01                | 0.03                      |

Table S1. Cont.

|                  | 1                                            |                           | 2                           |                           | 3                           |                           | 4                           |                           |        |
|------------------|----------------------------------------------|---------------------------|-----------------------------|---------------------------|-----------------------------|---------------------------|-----------------------------|---------------------------|--------|
|                  | Conc. (mg·L <sup>-1</sup> )                  | LOQ (mg·L <sup>-1</sup> ) | Conc. (mg·L <sup>-1</sup> ) | LOQ (mg·L <sup>-1</sup> ) | Conc. (mg·L <sup>-1</sup> ) | LOQ (mg·L <sup>-1</sup> ) | Conc. (mg·L <sup>-1</sup> ) | LOQ (mg·L <sup>-1</sup> ) |        |
|                  | <i>Catechin</i>                              | 19.9 ± 0.2                | 0.3                         | 2.8 ± 0.4                 | 0.08                        | 4.6 ± 0.3                 | 0.04                        | 3.177 ± 0.241             | 0.08   |
|                  | <i>Galloylated dimer</i>                     | n.d.                      | <0.002                      | n.d.                      | <0.002                      | n.d.                      | <0.002                      | n.d.                      | <0.002 |
|                  | <i>Trimer-1 (1 isomer)</i>                   | 0.44 ± 0.05               | 0.02                        | 0.02 ± 0.02               | <0.007                      | 0.08 ± 0.03               | <0.007                      | 0.041 ± 0.008             | 0.007  |
|                  | <i>Trimers-2 (several isomers)</i>           | 0.209 ± 0.004             | <0.002                      | 0.001 ± 0.003             | 0.03                        | 0.024 ± 0.002             | 0.03                        | 0.035 ± 0.005             | 0.03   |
|                  | <i>(epi)cat-ethyl-(epi)cat-1 (1 isomer)</i>  | n.d.                      | <0.08                       | n.d.                      | <0.08                       | n.d.                      | <0.08                       | n.d.                      | <0.08  |
| Flavan-3-ols     | <i>(epi)cat-ethyl-(epi)cat-2 (2 isomers)</i> | n.d.                      | <0.0007                     | n.d.                      | 0.008                       | n.d.                      | 0.02                        | n.d.                      | 0.001  |
|                  | <i>Epicatechin</i>                           | 5.5 ± 0.3                 | 3                           | 1.8 ± 0.2                 | 0.6                         | 0.8 ± 0.6                 | 0.2                         | 1.9 ± 0.7                 | 0.9    |
|                  | <i>Dimer B2</i>                              | 2.73 ± 0.07               | 0.06                        | 0.48 ± 0.02               | 0.05                        | 0.33 ± 0.02               | 0.04                        | 0.94 ± 0.03               | 0.03   |
|                  | <i>Dimer B1</i>                              | 18.7 ± 0.2                | 0.05                        | 1.96 ± 0.05               | 0.05                        | 5.3 ± 0.2                 | 0.03                        | 2.9 ± 0.2                 | 0.03   |
|                  | <i>Dimer B3</i>                              | 1.04 ± 0.05               | 0.04                        | 0.165 ± 0.007             | 0.02                        | 0.17 ± 0.02               | 0.02                        | 0.218 ± 0.008             | 0.04   |
|                  | <i>Dimer B4</i>                              | 0.25 ± 0.08               | 0.4                         | 0.06 ± 0.04               | 0.06                        | n.d.                      | 0.2                         | 0.19 ± 0.06               | 0.07   |
|                  | <i>Astilbin</i>                              | 0.84 ± 0.04               | 0.003                       | 0.75 ± 0.02               | 0.002                       | 0.488 ± 0.009             | 0.001                       | 0.98 ± 0.03               | 0.01   |
| Dihydroflavonols | <i>Taxifolin</i>                             | 0.73 ± 0.03               | 0.2                         | 0.32 ± 0.02               | 0.2                         | 0.25 ± 0.05               | 0.07                        | 0.46 ± 0.04               | 0.2    |
|                  | <i>Malvidin 3,5-diGlc</i>                    | 0.045 ± 0.004             | 0.4                         | 0.38 ± 0.02               | 0.2                         | 0.03 ± 0.02               | 0.08                        | 0.067 ± 0.007             | 0.6    |
|                  | <i>Delphinidin 3,5-diGlc</i>                 | 0.052 ± 0.014             | 0.02                        | 0.036 ± 0.01              | 0.02                        | n.d.                      | 0.02                        | 0.042 ± 0.006             | 0.02   |
|                  | <i>Cyanidin 3,5-diGlc</i>                    | 0.021 ± 0.004             | 0.02                        | n.d.                      | 0.02                        | n.d.                      | 0.02                        | 0.01 ± 0.02               | 0.02   |
|                  | <i>Petunidin 3,5-diGlc</i>                   | n.d.                      | 0.02                        | n.d.                      | 0.02                        | n.d.                      | 0.02                        | n.d.                      | 0.02   |
|                  | <i>Peonidin 3,5-diGlc</i>                    | 0.04 ± 0.02               | 0.2                         | 0.21 ± 0.03               | 0.1                         | 0.005 ± 0.009             | 0.02                        | 0.036 ± 0.005             | 0.2    |
|                  | <i>Malvidin 3-O-Glc</i>                      | 6.68 ± 0.03               | 0.02                        | 2.88 ± 0.05               | 0.2                         | 1.6 ± 0.02                | 0.005                       | 4.38 ± 0.1                | 0.04   |
|                  | <i>Delphinidin 3-O-Glc</i>                   | 0.316 ± 0.006             | 0.03                        | 0.0167 ± 0.0008           | 0.02                        | 0.0142 ± 0.0004           | 0.002                       | 0.16 ± 0.02               | 0.01   |
| Anthocyanins     | <i>Cyanidin 3-O-Glc</i>                      | 0.0465 ± 0.0006           | 0.002                       | 0.0065 ± 0.0005           | 0.004                       | 0.005 ± 0.002             | 0.0007                      | 0.021 ± 0.002             | 0.002  |
|                  | <i>Petunidin 3-O-Glc</i>                     | 0.8 ± 0.03                | 0.02                        | 0.036 ± 0.005             | 0.002                       | 0.07 ± 0.006              | 0.005                       | 0.41 ± 0.02               | 0.02   |
|                  | <i>Peonidin 3-O-Glc</i>                      | 1.25 ± 0.02               | 0.03                        | 0.9 ± 0.03                | 0.06                        | 0.203 ± 0.006             | 0.004                       | 0.56 ± 0.01               | 0.02   |
|                  | <i>Delphinidin 3-O-acetyl-Glc</i>            | 0.0269 ± 0.0004           | 0.003                       | 0.0027 ± 0.0009           | 0.002                       | 0.0044 ± 0.0003           | 0.002                       | 0.086 ± 0.004             | 0.003  |
|                  | <i>Cyanidin 3-O-acetyl-Glc</i>               | 0.0086 ± 0.0004           | 0.002                       | 0.0009 ± 0.0002           | 0.0007                      | 0.0068 ± 0.0003           | 0.0007                      | 0.036 ± 0.003             | 0.002  |
|                  | <i>Petunidin 3-O-acetyl-Glc</i>              | 0.046 ± 0.002             | 0.002                       | 0.0031 ± 0.0004           | 0.002                       | 0.0128 ± 0.001            | 0.002                       | 0.132 ± 0.006             | 0.0009 |
|                  | <i>Peonidin 3-O-acetyl-Glc</i>               | 0.131 ± 0.006             | 0.0008                      | 0.016 ± 0.002             | 0.0003                      | 0.161 ± 0.005             | 0.0005                      | 0.45 ± 0.02               | 0.002  |

Table S1. Cont.

|                                                                                  | 1                           |                           | 2                           |                           | 3                           |                           | 4                           |                           |
|----------------------------------------------------------------------------------|-----------------------------|---------------------------|-----------------------------|---------------------------|-----------------------------|---------------------------|-----------------------------|---------------------------|
|                                                                                  | Conc. (mg·L <sup>-1</sup> ) | LOQ (mg·L <sup>-1</sup> ) | Conc. (mg·L <sup>-1</sup> ) | LOQ (mg·L <sup>-1</sup> ) | Conc. (mg·L <sup>-1</sup> ) | LOQ (mg·L <sup>-1</sup> ) | Conc. (mg·L <sup>-1</sup> ) | LOQ (mg·L <sup>-1</sup> ) |
| <i>Malvidin 3-O-acetyl-Glc</i>                                                   | 0.565 ± 0.005               | 0.003                     | 0.049 ± 0.002               | 0.0008                    | 0.451 ± 0.003               | 0.004                     | 1.73 ± 0.06                 | 0.002                     |
| <i>Delphinidin 3-O-coumaroyl-Glc</i><br>( <i>cis-</i> and <i>trans-</i> isomers) | 0.05 ± 0.02                 | 0.002                     | 0.001 ± 0.002               | 0.004                     | 0 ± 0.0001                  | 0.002                     | 0.018 ± 0.005               | 0.0006                    |
| <i>Cyanidin 3-O-coumaroyl-Glc</i><br>( <i>cis-</i> and <i>trans-</i> isomers)    | 0.032 ± 0.006               | 0.004                     | 0.002 ± 0.003               | 0.0009                    | 0.008 ± 0.003               | 0.002                     | 0.007 ± 0.004               | 0.0004                    |
| <i>Petunidin 3-O-coumaroyl-Glc</i><br>( <i>cis-</i> and <i>trans-</i> isomers)   | 0.095 ± 0.006               | 0.005                     | 0.005 ± 0.002               | 0.002                     | 0.011 ± 0.002               | 0.0005                    | 0.023 ± 0.005               | 0.002                     |
| <i>Peonidin 3-O-coumaroyl-Glc</i><br>( <i>cis-</i> and <i>trans-</i> isomers)    | 0.271 ± 0.006               | 0.003                     | 0.0113 ± 0.0006             | 0.0002                    | 0.09 ± 0.002                | 0.002                     | 0.076 ± 0.002               | 0.002                     |
| <i>Malvidin 3-O-coumaroyl-Glc</i><br>( <i>cis-</i> and <i>trans-</i> isomers)    | 0.93 ± 0.03                 | 0.004                     | 0.076 ± 0.002               | 0.0004                    | 0.213 ± 0.003               | 0.0009                    | 0.282 ± 0.008               | 0.003                     |
| <i>Delphinidin 3-O-caffeoyl-Glc</i>                                              | n.d.                        | 0.0009                    | n.d.                        | 0.002                     | n.d.                        | 0.003                     | n.d.                        | 0.03                      |
| <i>Cyanidin 3-O-caffeoyl-Glc</i>                                                 | n.d.                        | 0.0005                    | n.d.                        | 0.0005                    | n.d.                        | 0.0006                    | n.d.                        | 0.002                     |
| <i>Petunidin 3-O-caffeoyl-Glc</i>                                                | n.d.                        | 0.0006                    | n.d.                        | 0.0009                    | n.d.                        | 0.0005                    | n.d.                        | 0.0006                    |
| <i>Peonidin 3-O-caffeoyl-Glc</i>                                                 | 0.006 ± 0.005               | 0.0007                    | n.d.                        | 0.0003                    | 0.002 ± 0.002               | 0.0006                    | 0.002 ± 0.003               | 0.0008                    |
| <i>Malvidin 3-O-caffeoyl-Glc</i>                                                 | 0.012 ± 0.004               | 0.002                     | 0.006 ± 0.008               | 0.0008                    | 0.005 ± 0.007               | 0.0009                    | 0.003 ± 0.002               | 0.002                     |
| <i>(epi)cat-ethyl-peonidin 3-O-Glc-1</i>                                         | n.d.                        | 0.002                     | n.d.                        | 0.0007                    | n.d.                        | 0.0008                    | n.d.                        | 0.003                     |
| <i>(epi)cat-ethyl-peonidin 3-O-Glc-2</i>                                         | n.d.                        | 0.002                     | n.d.                        | 0.0007                    | n.d.                        | 0.0008                    | n.d.                        | 0.003                     |
| <i>(epi)cat-ethyl-peonidin 3-O-Glc-3</i>                                         | 0.0005 ± 0.0009             | 0.002                     | n.d.                        | 0.0007                    | n.d.                        | 0.0008                    | n.d.                        | 0.003                     |
| <i>(epi)cat-ethyl-peonidin 3-O-Glc-4</i>                                         | n.d.                        | 0.002                     | n.d.                        | 0.0007                    | n.d.                        | 0.0008                    | n.d.                        | 0.003                     |
| <i>(epi)cat-ethyl-malvidin 3-O-Glc-1</i>                                         | n.d.                        | 0.002                     | n.d.                        | 0.003                     | n.d.                        | 0.003                     | n.d.                        | 0.003                     |
| <i>(epi)cat-ethyl-malvidin 3-O-Glc-2</i>                                         | n.d.                        | 0.002                     | n.d.                        | 0.003                     | n.d.                        | 0.003                     | n.d.                        | 0.003                     |
| <i>(epi)cat-ethyl-malvidin 3-O-Glc-3 and 4</i>                                   | 0.001 ± 0.002               | 0.002                     | n.d.                        | 0.003                     | n.d.                        | 0.003                     | n.d.                        | 0.003                     |
| <i>(epi)cat-ethyl-malvidin</i><br><i>3-O-coumaroyl-Glc (2 co-eluted isomers)</i> | 0.005 ± 0.008               | 0.003                     | n.d.                        | 0.0004                    | 0.002 ± 0.004               | 0.0004                    | n.d.                        | 0.0006                    |
| <i>Delphinidin 3-O-Glc-(epi)cat</i>                                              | n.d.                        | 0.002                     | n.d.                        | 0.003                     | n.d.                        | 0.003                     | n.d.                        | 0.003                     |
| <i>Cyanidin 3-O-Glc-(epi)cat</i>                                                 | 0.003 ± 0.003               | 0.04                      | n.d.                        | 0.002                     | n.d.                        | 0.004                     | n.d.                        | 0.002                     |
| <i>Petunidin 3-O-Glc-(epi)cat</i>                                                | 0.015 ± 0.008               | 0.06                      | n.d.                        | 0.003                     | n.d.                        | 0.003                     | n.d.                        | 0.005                     |

Table S1. Cont.

|                                                        | 1                           |                           | 2                           |                           | 3                           |                           | 4                           |                           |
|--------------------------------------------------------|-----------------------------|---------------------------|-----------------------------|---------------------------|-----------------------------|---------------------------|-----------------------------|---------------------------|
|                                                        | Conc. (mg·L <sup>-1</sup> ) | LOQ (mg·L <sup>-1</sup> ) | Conc. (mg·L <sup>-1</sup> ) | LOQ (mg·L <sup>-1</sup> ) | Conc. (mg·L <sup>-1</sup> ) | LOQ (mg·L <sup>-1</sup> ) | Conc. (mg·L <sup>-1</sup> ) | LOQ (mg·L <sup>-1</sup> ) |
| <i>Peonidin 3-O-Glc-(epi)cat</i>                       | 0.07 ± 0.04                 | 0.002                     | 0.005 ± 0.006               | 0.002                     | 0.0004 ± 0.0008             | 0.002                     | 0.02 ± 0.02                 | 0.003                     |
| <i>Malvidin 3-O-Glc-(epi)cat (2 isomers)</i>           | 0.16 ± 0.009                | 0.005                     | 0.014 ± 0.001               | 0.002                     | 0.007 ± 0.002               | 0.001                     | 0.044 ± 0.004               | 0.02                      |
| <i>Malvidin 3-O-coumaroyl-Glc-(epi)cat (2 isomers)</i> | 0.0004 ± 0.0004             | 0.005                     | n.d.                        | 0.003                     | n.d.                        | 0.0008                    | n.d.                        | 0.002                     |
| <i>(epi)cat-delphinidin 3-O-Glc A-F bicyclic</i>       | 0.001 ± 0.003               | 0.002                     | n.d.                        | 0.002                     | n.d.                        | 0.005                     | n.d.                        | 0.007                     |
| <i>(epi)cat-cyanidin 3-O-Glc A-F bicyclic</i>          | n.d.                        | 0.002                     | n.d.                        | 0.003                     | n.d.                        | 0.002                     | n.d.                        | 0.004                     |
| <i>(epi)cat-petunidin 3-O-Glc A-F bicyclic</i>         | 0.006 ± 0.009               | 0.005                     | n.d.                        | 0.004                     | n.d.                        | 0.005                     | n.d.                        | 0.006                     |
| <i>(epi)cat-peonidin 3-O-Glc A-F bicyclic</i>          | 0.004 ± 0.004               | 0.002                     | n.d.                        | 0.007                     | n.d.                        | 0.006                     | 0.002 ± 0.004               | 0.003                     |
| <i>(epi)cat-malvidin 3-O-Glc A-F bicyclic</i>          | 0.005 ± 0.004               | 0.04                      | n.d.                        | 0.002                     | 0.0004 ± 0.0008             | 0.002                     | 0.0005 ± 0.0009             | 0.002                     |
| <i>Caftaric-peonidin 3-O-Glc (2 isomers)</i>           | 0.005 ± 0.006               | 0.002                     | 0.03 ± 0.02                 | 0.002                     | 0.0003 ± 0.0002             | 0.002                     | 0.003 ± 0.003               | 0.002                     |
| <i>Caftaric-malvidin 3-O-Glc (2 isomers)</i>           | 0.026 ± 0.008               | 0.002                     | 0.04 ± 0.008                | 0.002                     | 0.009 ± 0.002               | 0.001                     | 0.006 ± 0.006               | 0.001                     |
| <i>Coutaric-malvidin 3-O-Glc (2 isomers)</i>           | n.d.                        | 0.02                      | n.d.                        | 0.002                     | n.d.                        | 0.002                     | n.d.                        | 0.002                     |
| <i>Pyranodelphinidin 3-O-Glc</i>                       | 0.001 ± 0.002               | 0.03                      | n.d.                        | 0.006                     | n.d.                        | 0.0009                    | n.d.                        | 0.002                     |
| <i>Pyranocyanidin 3-O-Glc</i>                          | 0.0004 ± 0.0007             | 0.02                      | n.d.                        | 0.02                      | n.d.                        | 0.06                      | n.d.                        | 0.03                      |
| <i>Pyranopetunidin 3-O-Glc</i>                         | 0.0001 ± 0.0003             | 0.008                     | n.d.                        | 0.03                      | 0 ± 0.0001                  | 0.02                      | 0.001 ± 0.002               | 0.02                      |
| <i>Pyranopeonidin 3-O-Glc</i>                          | 0.003 ± 0.002               | 0.003                     | 0.0008 ± 0.0009             | 0.003                     | 0.0004 ± 0.0003             | 0.003                     | 0.0003 ± 0.0006             | 0.005                     |
| <i>Pyranomalvidin 3-O-Glc (vitisin B)</i>              | 0.014 ± 0.003               | 0.007                     | 0.0009 ± 0.0009             | 0.005                     | 0.0021 ± 0.0004             | 0.002                     | 0.006 ± 0.002               | 0.005                     |
| <i>Carboxypyranodelphinidin 3-O-Glc</i>                | 0.01 ± 0.01                 | 0.02                      | 0.0002 ± 0.0004             | 0.003                     | n.d.                        | 0.002                     | 0.004 ± 0.002               | 0.005                     |
| <i>Carboxypyranocyanidin 3-O-Glc</i>                   | n.d.                        | 0.02                      | n.d.                        | 0.0003                    | n.d.                        | 0.009                     | n.d.                        | 0.03                      |
| <i>Carboxypyranopetunidin 3-O-Glc</i>                  | 0.005 ± 0.006               | 0.0008                    | n.d.                        | 0.03                      | n.d.                        | 0.009                     | 0.001 ± 0.002               | 0.02                      |
| <i>Carboxypyranopeonidin 3-O-Glc</i>                   | 0.027 ± 0.008               | 0.0004                    | 0.0034 ± 0.001              | 0.0004                    | 0.0013 ± 0.0008             | 0.0004                    | 0.007 ± 0.003               | 0.0005                    |
| <i>Carboxypyranomalvidin 3-O-Glc (vitisin A)</i>       | 0.12 ± 0.02                 | 0.003                     | 0.012 ± 0.003               | 0.002                     | 0.0114 ± 0.0009             | 0.0004                    | 0.086 ± 0.01                | 0.005                     |
| <i>Pyranodelphinidin 3-O-acetyl-Glc</i>                | n.d.                        | 0.003                     | n.d.                        | 0.0006                    | n.d.                        | 0.0006                    | n.d.                        | 0.005                     |
| <i>Pyranocyanidin 3-O-acetyl-Glc</i>                   | 0.0003 ± 0.0003             | 0.008                     | 0.0001 ± 0.0002             | 0.0007                    | n.d.                        | 0.0009                    | 0.0001 ± 0.0002             | 0.002                     |
| <i>Pyranopetunidin 3-O-acetyl-Glc</i>                  | n.d.                        | 0.0002                    | n.d.                        | 0.0005                    | n.d.                        | 0.0005                    | n.d.                        | 0.0007                    |
| <i>Pyranopeonidin 3-O-acetyl-Glc</i>                   | n.d.                        | 0.001                     | n.d.                        | 0.001                     | n.d.                        | 0.0006                    | n.d.                        | 0.0003                    |
| <i>Pyranomalvidin 3-O-acetyl-Glc</i>                   | n.d.                        | 0.0004                    | n.d.                        | 0.0005                    | n.d.                        | 0.002                     | n.d.                        | 0.0004                    |
| <i>Carboxypyranodelphinidin 3-O-acetyl-Glc</i>         | n.d.                        | 0.001                     | n.d.                        | 0.0005                    | n.d.                        | 0.0008                    | n.d.                        | 0.0008                    |

Table S1. Cont.

|                                                        | 1                           |                           | 2                           |                           | 3                           |                           | 4                           |                           |
|--------------------------------------------------------|-----------------------------|---------------------------|-----------------------------|---------------------------|-----------------------------|---------------------------|-----------------------------|---------------------------|
|                                                        | Conc. (mg·L <sup>-1</sup> ) | LOQ (mg·L <sup>-1</sup> ) | Conc. (mg·L <sup>-1</sup> ) | LOQ (mg·L <sup>-1</sup> ) | Conc. (mg·L <sup>-1</sup> ) | LOQ (mg·L <sup>-1</sup> ) | Conc. (mg·L <sup>-1</sup> ) | LOQ (mg·L <sup>-1</sup> ) |
| <i>Carboxypyranocyanidin 3-O-acetyl-Glc</i>            | 0.0002 ± 0.0004             | 0.002                     | n.d.                        | 0.01                      | n.d.                        | 0.0003                    | 0.0002 ± 0.0004             | 0.0006                    |
| <i>Carboxypyranopetunidin 3-O-acetyl-Glc</i>           | n.d.                        | 0.003                     | n.d.                        | 0.0004                    | n.d.                        | 0.0006                    | 0.0002 ± 0.0003             | 0.0004                    |
| <i>Carboxypyranopeonidin 3-O-acetyl-Glc</i>            | n.d.                        | 0.005                     | n.d.                        | 0.002                     | n.d.                        | 0.04                      | 0.0008 ± 0.0007             | 0.003                     |
| <i>Carboxypyranomalvidin 3-O-acetyl-Glc</i>            | 0.008 ± 0.004               | 0.001                     | n.d.                        | 0.002                     | 0.002 ± 0.004               | 0.002                     | 0.017 ± 0.003               | 0.002                     |
| <i>Pyranopetunidin 3-O-coumaroyl-Glc</i>               | n.d.                        | 0.0007                    | n.d.                        | 0.0003                    | n.d.                        | 0.0004                    | n.d.                        | 0.0005                    |
| <i>Pyranopeonidin 3-O-coumaroyl-Glc</i>                | n.d.                        | 0.008                     | n.d.                        | 0.0008                    | n.d.                        | 0.003                     | n.d.                        | 0.002                     |
| <i>Pyranomalvidin 3-O-coumaroyl-Glc</i>                | 0.001 ± 0.003               | 0.0007                    | n.d.                        | 0.002                     | n.d.                        | 0.003                     | n.d.                        | 0.0009                    |
| <i>Carboxypyranopetunidin 3-O-coumaroyl-Glc</i>        | 0.001 ± 0.002               | 0.002                     | n.d.                        | 0.002                     | n.d.                        | 0.002                     | n.d.                        | 0.002                     |
| <i>Carboxypyranopeonidin 3-O-coumaroyl-Glc</i>         | 0.004 ± 0.004               | 0.0005                    | n.d.                        | 0.0005                    | n.d.                        | 0.0004                    | 0.001 ± 0.002               | 0.002                     |
| <i>Carboxypyranomalvidin 3-O-coumaroyl-Glc</i>         | 0.008 ± 0.002               | 0.0004                    | n.d.                        | 0.0004                    | n.d.                        | 0.0004                    | 0.002 ± 0.004               | 0.0002                    |
| <i>p-hydroxyphenylpyranopeonidin 3-O-Glc</i>           | 0.006 ± 0.003               | 0.004                     | 0.011 ± 0.002               | 0.02                      | 0.006 ± 0.005               | 0.004                     | 0.05 ± 0.02                 | 0.05                      |
| <i>p-hydroxyphenylpyranomalvidin 3-O-Glc</i>           | 0.04 ± 0.02                 | 0.0005                    | 0.05 ± 0.02                 | 0.0003                    | 0.055 ± 0.005               | 0.0002                    | 0.49 ± 0.03                 | 0.0003                    |
| <i>p-hydroxyphenylpyranopeonidin 3-O-acetyl-Glc</i>    | 0.0003 ± 0.0006             | 0.0004                    | n.d.                        | 0.0005                    | 0.005 ± 0.002               | 0.0003                    | 0.027 ± 0.008               | 0.0002                    |
| <i>p-hydroxyphenylpyranomalvidin 3-O-acetyl-Glc</i>    | 0.0026 ± 0.0004             | 0.0                       | 0.001 ± 0.002               | 0.0002                    | 0.012 ± 0.005               | 0.0002                    | 0.13 ± 0.04                 | 0.0002                    |
| <i>p-hydroxyphenylpyranopeonidin 3-O-coumaroyl-Glc</i> | 0.0006 ± 0.0003             | 0.0004                    | n.d.                        | 0.0002                    | 0.001 ± 0.002               | 0.0004                    | 0.0191 ± 0.0004             | 0.0004                    |
| <i>p-hydroxyphenylpyranomalvidin 3-O-coumaroyl-Glc</i> | 0.007 ± 0.002               | 0.0006                    | 0.0004 ± 0.0007             | 0.0004                    | 0.018 ± 0.009               | 0.0005                    | 0.08 ± 0.02                 | 0.0002                    |
| <i>Catechylpyranopeonidin 3-O-Glc</i>                  | 0.013 ± 0.003               | 0.0003                    | 0.001 ± 0.002               | 0.0002                    | 0.002 ± 0.002               | 0.0004                    | 0.06 ± 0.02                 | 0.0004                    |
| <i>Catechylpyranomalvidin 3-O-Glc (pinotin A)</i>      | 0.07 ± 0.02                 | 0.005                     | 0.003 ± 0.002               | 0.0006                    | 0.026 ± 0.009               | 0.0005                    | 0.108 ± 0.01                | 0.0003                    |
| <i>Catechylpyranopetunidin 3-O-acetyl-Glc</i>          | 0.0004 ± 0.0007             | 0.0002                    | n.d.                        | 0.0007                    | n.d.                        | 0.0002                    | 0.013 ± 0.007               | 0.0002                    |
| <i>Catechylpyranopeonidin 3-O-acetyl-Glc</i>           | n.d.                        | 0.0002                    | n.d.                        | 0.0007                    | 0.0002 ± 0.0003             | 0.0003                    | 0.015 ± 0.007               | 0.0004                    |
| <i>Catechylpyranomalvidin 3-O-acetyl-Glc</i>           | 0.002 ± 0.003               | 0.0005                    | 0.0001 ± 0.0002             | 0.0005                    | 0.005 ± 0.003               | 0.0005                    | 0.054 ± 0.007               | 0.0006                    |
| <i>Catechylpyranopetunidin 3-O-coumaroyl-Glc</i>       | n.d.                        | 0.0004                    | n.d.                        | 0.0004                    | 0.0001 ± 0.0002             | 0.0002                    | 0.005 ± 0.005               | 0.0002                    |
| <i>Catechylpyranopeonidin 3-O-coumaroyl-Glc</i>        | 0.003 ± 0.002               | 0.0002                    | n.d.                        | 0.0002                    | 0.003 ± 0.003               | 0.0003                    | 0.015 ± 0.006               | 0.00                      |
| <i>Catechylpyranomalvidin 3-O-coumaroyl-Glc</i>        | 0.018 ± 0.008               | 0.0005                    | n.d.                        | 0.0002                    | 0.004 ± 0.003               | 0.0003                    | 0.019 ± 0.006               | 0.003                     |
| <i>Guaiacylpyranomalvidin 3-O-Glc</i>                  | 0.01 ± 0.009                | 0.0006                    | 0.049 ± 0.01                | 0.0002                    | 0.059 ± 0.016               | 0.0002                    | 0.19 ± 0.03                 | 0.0003                    |
| <i>Guaiacylpyranomalvidin 3-O-acetyl-Glc</i>           | 0.0002 ± 0.0003             | 0.0002                    | 0.001 ± 0.002               | 0.0002                    | 0.0096 ± 0.0009             | 0.0003                    | 0.057 ± 0.009               | 0.0003                    |

Table S1. Cont.

|                                  | 1                                                |                           | 2                           |                           | 3                           |                           | 4                           |                           |        |
|----------------------------------|--------------------------------------------------|---------------------------|-----------------------------|---------------------------|-----------------------------|---------------------------|-----------------------------|---------------------------|--------|
|                                  | Conc. (mg·L <sup>-1</sup> )                      | LOQ (mg·L <sup>-1</sup> ) | Conc. (mg·L <sup>-1</sup> ) | LOQ (mg·L <sup>-1</sup> ) | Conc. (mg·L <sup>-1</sup> ) | LOQ (mg·L <sup>-1</sup> ) | Conc. (mg·L <sup>-1</sup> ) | LOQ (mg·L <sup>-1</sup> ) |        |
| Anthocyanins                     | <i>Guaiacylpyranomalvidin 3-O-coumaroyl-Glc</i>  | 0.003 ± 0.002             | 0.0003                      | 0.0001 ± 0.0003           | 0.0009                      | 0.016 ± 0.004             | 0.0003                      | 0.022 ± 0.004             | 0.002  |
|                                  | <i>Syringylpyranomalvidin 3-O-Glc</i>            | n.d.                      | 0.007                       | n.d.                      | 0.002                       | n.d.                      | 0.0009                      | 0 ± 0.0001                | 0.002  |
|                                  | <i>Petunidin 3-O-acetyl-Glc-(epi)cat</i>         | n.d.                      | 0.003                       | n.d.                      | 0.003                       | n.d.                      | 0.002                       | n.d.                      | 0.04   |
|                                  | <i>Peonidin 3-O-acetyl-Glc-(epi)cat</i>          | n.d.                      | 0.002                       | n.d.                      | 0.005                       | n.d.                      | 0.003                       | n.d.                      | 0.002  |
|                                  | <i>Malvidin 3-O-acetyl-Glc-(epi)cat</i>          | n.d.                      | 0.002                       | n.d.                      | 0.002                       | n.d.                      | 0.0004                      | n.d.                      | 0.001  |
|                                  | <i>Pyranopeonidin 3-O-Glc-(epi)cat</i>           | 0.0021 ± 0.0004           | 0.0005                      | n.d.                      | 0.0010                      | n.d.                      | 0.0007                      | 0.0008 ± 0.0008           | 0.0005 |
|                                  | <i>Pyranomalvidin 3-O-Glc-(epi)cat</i>           | 0.004 ± 0.004             | 0.0004                      | n.d.                      | 0.0003                      | n.d.                      | 0.0002                      | 0.001 ± 0.002             | 0.0003 |
|                                  | <i>Pyranomalvidin 3-O-coumaroyl-Glc-(epi)cat</i> | n.d.                      | 0.002                       | n.d.                      | 0.002                       | n.d.                      | 0.002                       | n.d.                      | 0.002  |
|                                  | <i>Unknown "551"</i>                             | 0.014 ± 0.01              | 0.02                        | 0.003 ± 0.003             | 0.0006                      | n.d.                      | 0.003                       | 0.002 ± 0.004             | 0.002  |
|                                  | <i>Unknown "581"</i>                             | 0.032 ± 0.01              | 0.004                       | 0.004 ± 0.002             | 0.002                       | 0.001 ± 0.002             | 0.003                       | 0.021 ± 0.006             | 0.004  |
|                                  | <i>Unknown "1095"</i>                            | n.d.                      | 0.02                        | n.d.                      | 0.02                        | n.d.                      | 0.03                        | n.d.                      | 0.02   |
| <i>Unknown "1099"</i>            | n.d.                                             | 0.02                      | n.d.                        | 0.004                     | n.d.                        | 0.002                     | 0.001 ± 0.0003              | 0.007                     |        |
| Others (aminoacids and alcohols) | <i>Tyrosine</i>                                  | 12.68 ± 0.02              | 0.4                         | 8.62 ± 0.06               | 0.6                         | 8.15 ± 0.07               | 0.7                         | 7.81 ± 0.074              | 0.7    |
|                                  | <i>Tyrosol</i>                                   | 7.97 ± 0.139              | 4                           | 6.585 ± 0.143             | 2                           | 9.9 ± 0.3                 | 2                           | 10.3 ± 0.6                | 4      |
|                                  | <i>Hydroxytyrosol</i>                            | 0.4 ± 0.04                | 0.07                        | 0.08 ± 0.02               | 0.2                         | 0.12 ± 0.02               | 0.03                        | 0.77 ± 0.03               | 0.2    |
|                                  | <i>Tryptophol</i>                                | 0.2 ± 0.1                 | 0.2                         | 0.17 ± 0.03               | 0.3                         | 0.4 ± 0.2                 | 0.2                         | 0.5 ± 0.3                 | 0.2    |
|                                  | <i>Tryptophan</i>                                | 1.2 ± 0.2                 | 0                           | 1.6 ± 0.5                 | 0                           | 0.8 ± 0.3                 | 0                           | 1 ± 0.2                   | 0      |

Table S1. Cont.

|                                       |                                                | 5                           |                           | 6                           |                           | 7                           |                           | 8                           |                           |
|---------------------------------------|------------------------------------------------|-----------------------------|---------------------------|-----------------------------|---------------------------|-----------------------------|---------------------------|-----------------------------|---------------------------|
|                                       |                                                | Conc. (mg·L <sup>-1</sup> ) | LOQ (mg·L <sup>-1</sup> ) | Conc. (mg·L <sup>-1</sup> ) | LOQ (mg·L <sup>-1</sup> ) | Conc. (mg·L <sup>-1</sup> ) | LOQ (mg·L <sup>-1</sup> ) | Conc. (mg·L <sup>-1</sup> ) | LOQ (mg·L <sup>-1</sup> ) |
| Benzoic acids and derivatives         | <i>Gallic acid</i>                             | 1.71 ± 0.06                 | 0.1                       | 13.8 ± 0.4                  | 0.07                      | 1.48 ± 0.04                 | 0.04                      | 2.36 ± 0.06                 | 0.08                      |
|                                       | <i>Protocatechuic acid</i>                     | 1.27 ± 0.05                 | 0.06                      | 2.2 ± 0.02                  | 0.07                      | 0.67 ± 0.02                 | 0.02                      | 1.4 ± 0.2                   | 0.05                      |
|                                       | <i>Syringic acid</i>                           | 2.7 ± 0.6                   | 0.05                      | 2.07 ± 0.03                 | 0.05                      | 0.48 ± 0.02                 | 0.08                      | 0.55 ± 0.003                | 0.04                      |
|                                       | <i>Vanillic acid</i>                           | 1.72 ± 0.1                  | 0.2                       | 1.55 ± 0.03                 | 0.2                       | 0.3 ± 0.2                   | 0.05                      | 0.86 ± 0.06                 | 0.05                      |
|                                       | <i>Ethyl gallate</i>                           | 0.25 ± 0.1                  | 0.006                     | 2 ± 0.3                     | 0.006                     | 0.11 ± 0.03                 | 0.01                      | 0.37 ± 0.03                 | 0.005                     |
|                                       | <i>Ethyl protocatechuate</i>                   | 0.3 ± 0.09                  | <0.02                     | 0.7 ± 0.2                   | <0.02                     | 0.07 ± 0.04                 | <0.02                     | 0.3 ± 0.2                   | <0.02                     |
| Hydroxycinnamic acids and derivatives | <i>Caffeic acid</i>                            | 2.33 ± 0.07                 | 0.09                      | 3.4 ± 0.2                   | 0.06                      | 1.69 ± 0.04                 | 0.2                       | 2.2 ± 0.4                   | 0.06                      |
|                                       | <i>p-coumaric acid</i>                         | 1.6 ± 0.2                   | 0.3                       | 1.3 ± 0.1                   | 0.5                       | 1.21 ± 0.08                 | 0.4                       | 0.7 ± 0.2                   | 0.3                       |
|                                       | <i>Ferulic acid</i>                            | 0.93 ± 0.07                 | 0.02                      | 0.11 ± 0.08                 | 0.06                      | 0.5 ± 0.2                   | 0.02                      | 0.2 ± 0.2                   | 0.04                      |
|                                       | <i>Caftaric acid (cis- and trans- isomers)</i> | 30.9 ± 0.7                  | 0.3                       | 23.8 ± 0.4                  | 0.3                       | 26.3 ± 0.4                  | 0.5                       | 48 ± 3                      | 0.2                       |
|                                       | <i>Coutaric acid (cis- and trans- isomers)</i> | 10 ± 2                      | 0.03                      | 7.705 ± 0.783               | 0.02                      | 12.5 ± 0.3                  | 0.07                      | 13 ± 0.9                    | 0.03                      |
|                                       | <i>Fertaric acid</i>                           | 6.3 ± 0.2                   | 0.006                     | 3.75 ± 0.1                  | 0.008                     | 5.23 ± 0.06                 | 0.007                     | 6.8 ± 0.3                   | 0.02                      |
|                                       | <i>GRP (cis- and trans- isomers)</i>           | 9 ± 2                       | 0.2                       | 0.44 ± 0.08                 | 0.4                       | 15.5 ± 0.3                  | 0.2                       | 11 ± 2                      | 0.2                       |
|                                       | <i>Ethyl caffeate</i>                          | 0.5 ± 0.2                   | 0.006                     | 0.22 ± 0.05                 | 0.03                      | 0.5 ± 0.2                   | 0.04                      | 0.39 ± 0.08                 | 0.008                     |
| <i>Ethyl coumarate</i>                | 0.15 ± 0.07                                    | 0.02                        | 0.087 ± 0.009             | 0.02                        | 0.3 ± 0.2                 | 0.01                        | 0.14 ± 0.04               | 0.05                        |                           |
| Stilbens                              | <i>trans-resveratrol</i>                       | 0.57 ± 0.04                 | 0.04                      | 0.264 ± 0.008               | 0.02                      | 0.15 ± 0.009                | 0.03                      | 0.16 ± 0.02                 | 0.02                      |
|                                       | <i>cis-resveratrol</i>                         | 0.53 ± 0.04                 | 0.04                      | 0.416 ± 0.005               | 0.03                      | 0.049 ± 0.007               | 0.04                      | 0.11 ± 0.02                 | 0.04                      |
|                                       | <i>viniferin-1</i>                             | 0.17 ± 0.09                 | 0.3                       | 0.22 ± 0.03                 | 0.3                       | 0.098 ± 0.007               | 0.2                       | 0.042 ± 0.008               | 0.07                      |
|                                       | <i>viniferin-2</i>                             | 0.029 ± 0.007               | 0.04                      | n.d.                        | 0.02                      | n.d.                        | 0.03                      | 0.011 ± 0.01                | 0.03                      |
|                                       | <i>trans-piceid</i>                            | 0.93 ± 0.03                 | 0.3                       | 0.38 ± 0.03                 | 0.8                       | 0.43 ± 0.07                 | 0.7                       | 0.4 ± 0.2                   | 0.8                       |
|                                       | <i>cis-piceid</i>                              | 2 ± 0.2                     | 0.4                       | 1.4 ± 0.2                   | 0.06                      | 1.04 ± 0.05                 | 0.2                       | 1 ± 0.2                     | 0.2                       |
| Flavonols                             | <i>Quercetin Glc</i>                           | 0.009 ± 0.006               | 0.02                      | 0.02 ± 0.005                | 0.009                     | 0.01 ± 0.009                | 0.008                     | 0.013 ± 0.003               | 0.02                      |
|                                       | <i>Myricetin glucuronide</i>                   | 0.028 ± 0.004               | 0.6                       | 0.12 ± 0.05                 | 4                         | 0.016 ± 0.006               | 0.8                       | 0.049 ± 0.003               | 0.5                       |
|                                       | <i>Myricetin Glc</i>                           | 0.052 ± 0.008               | 0.007                     | 0.33 ± 0.07                 | 0.0008                    | 0.071 ± 0.009               | 0.002                     | 0.044 ± 0.009               | 0.006                     |
|                                       | <i>Quercetin glucuronide</i>                   | 0.443 ± 0.006               | 0.007                     | 1.39 ± 0.05                 | 0.003                     | 0.84 ± 0.04                 | 0.003                     | 0.68 ± 0.04                 | 0.009                     |
|                                       | <i>Quercetin</i>                               | n.d.                        | 0.04                      | n.d.                        | 0.02                      | n.d.                        | 0.07                      | 0.1 ± 0.05                  | 0.03                      |

Table S1. Cont.

|                                | 5                                            |                           | 6                           |                           | 7                           |                           | 8                           |                           |        |
|--------------------------------|----------------------------------------------|---------------------------|-----------------------------|---------------------------|-----------------------------|---------------------------|-----------------------------|---------------------------|--------|
|                                | Conc. (mg·L <sup>-1</sup> )                  | LOQ (mg·L <sup>-1</sup> ) | Conc. (mg·L <sup>-1</sup> ) | LOQ (mg·L <sup>-1</sup> ) | Conc. (mg·L <sup>-1</sup> ) | LOQ (mg·L <sup>-1</sup> ) | Conc. (mg·L <sup>-1</sup> ) | LOQ (mg·L <sup>-1</sup> ) |        |
| Flavan-3-ols                   | <i>Catechin</i>                              | 6.3 ± 1                   | 0.09                        | 10.8 ± 0.2                | 0.3                         | 5.2 ± 0.8                 | 0.08                        | 4.7 ± 0.5                 | 0.06   |
|                                | <i>Galloylated dimer</i>                     | n.d.                      | <0.002                      | n.d.                      | 0.002                       | n.d.                      | <0.002                      | n.d.                      | <0.002 |
|                                | <i>Trimer-1 (1 isomer)</i>                   | 0.17 ± 0.03               | <0.007                      | 0.46 ± 0.06               | <0.007                      | 0.14 ± 0.04               | <0.007                      | 0.106 ± 0.007             | <0.007 |
|                                | <i>Trimers-2 (several isomers)</i>           | 0.07 ± 0.02               | 0.002                       | 0.64 ± 0.04               | 0.06                        | 0.07 ± 0.002              | <0.002                      | 0.024 ± 0.01              | 0.04   |
|                                | <i>(epi)cat-ethyl-(epi)cat-1 (1 isomer)</i>  | n.d.                      | 0.2                         | n.d.                      | < 0.08                      | n.d.                      | <0.08                       | n.d.                      | <0.08  |
|                                | <i>(epi)cat-ethyl-(epi)cat-2 (2 isomers)</i> | n.d.                      | 0.003                       | n.d.                      | <0.0007                     | n.d.                      | <0.0007                     | n.d.                      | 0.005  |
|                                | <i>Epicatechin</i>                           | 2.6 ± 0.2                 | 1                           | 6.3 ± 0.7                 | 4                           | 2.8 ± 1                   | 0.7                         | 3 ± 2                     | 1      |
|                                | <i>Dimer B2</i>                              | 1.12 ± 0.03               | 0.04                        | 5.04 ± 0.02               | 0.04                        | 0.8 ± 0.05                | 0.06                        | 1.22 ± 0.03               | 0.03   |
|                                | <i>Dimer B1</i>                              | 6.05 ± 0.05               | 0.04                        | 12.6 ± 0.2                | 0.04                        | 9.5 ± 0.2                 | 0.04                        | 5.9 ± 0.3                 | 0.03   |
|                                | <i>Dimer B3</i>                              | 0.41 ± 0.02               | 0.02                        | 1.59 ± 0.04               | 0.8                         | 0.2 ± 0.02                | 0.04                        | 0.29 ± 0.03               | 0.04   |
| <i>Dimer B4</i>                | 0.4 ± 0.2                                    | 0.08                      | 1.5 ± 0.4                   | 0.7                       | 0.05 ± 0.03                 | 0.4                       | 0.12 ± 0.08                 | 0.2                       |        |
| Dihydroflavonols               | <i>Astilbin</i>                              | 2.89 ± 0.04               | 0.03                        | 0.2 ± 0.05                | 0.008                       | 0.98 ± 0.02               | 0.002                       | 0.1 ± 0.03                | 0.002  |
|                                | <i>Taxifolin</i>                             | 0.98 ± 0.03               | 0.3                         | 0.18 ± 0.08               | 0.05                        | 0.41 ± 0.05               | 0.3                         | 0.19 ± 0.02               | 0.2    |
| Anthocyanins                   | <i>Malvidin 3,5-diGlc</i>                    | 0.23 ± 0.03               | 0.6                         | 0.14 ± 0.03               | 2                           | 0.053 ± 0.004             | 0.1                         | 0.047 ± 0.008             | 0.6    |
|                                | <i>Delphinidin 3,5-diGlc</i>                 | 0.04 ± 0.02               | 0.02                        | 0.063 ± 0.014             | 0.02                        | n.d.                      | 0.02                        | 0.06 ± 0.02               | 0.02   |
|                                | <i>Cyanidin 3,5-diGlc</i>                    | n.d.                      | 0.02                        | 0.0191 ± 0.0009           | 0.02                        | n.d.                      | 0.02                        | 0.0226 ± 0.0005           | 0.02   |
|                                | <i>Petunidin 3,5-diGlc</i>                   | n.d.                      | 0.02                        | 0.01 ± 0.02               | 0.03                        | n.d.                      | 0.02                        | 0.01 ± 0.02               | 0.05   |
|                                | <i>Peonidin 3,5-diGlc</i>                    | 0.112 ± 0.006             | 0.4                         | 0.05 ± 0.02               | 0.2                         | 0.028 ± 0.005             | 0.04                        | 0.032 ± 0.002             | 0.2    |
|                                | <i>Malvidin 3-O-Glc</i>                      | 13.09 ± 0.1               | 0.05                        | 17.3 ± 0.2                | 0.07                        | 4.49 ± 0.1                | 0.02                        | 11.6 ± 0.2                | 0.04   |
|                                | <i>Delphinidin 3-O-Glc</i>                   | 0.09 ± 0.006              | 0.02                        | 0.47 ± 0.04               | 0.03                        | 0.075 ± 0.003             | 0.002                       | 0.432 ± 0.008             | 0.03   |
|                                | <i>Cyanidin 3-O-Glc</i>                      | 0.022 ± 0.001             | 0.002                       | 0.052 ± 0.001             | 0.002                       | 0.015 ± 0.002             | 0.005                       | 0.06 ± 0.002              | 0.003  |
|                                | <i>Petunidin 3-O-Glc</i>                     | 0.42 ± 0.02               | 0.007                       | 1.4 ± 0.2                 | 0.02                        | 0.28 ± 0.008              | 0.004                       | 1.24 ± 0.03               | 0.02   |
|                                | <i>Peonidin 3-O-Glc</i>                      | 1.34 ± 0.02               | 0.04                        | 0.967 ± 0.008             | 0.02                        | 0.544 ± 0.004             | 0.008                       | 1.28 ± 0.02               | 0.03   |
|                                | <i>Delphinidin 3-O-acetyl-Glc</i>            | 0.01 ± 0.002              | 0.003                       | 0.387 ± 0.004             | 0.004                       | 0.0167 ± 0.0004           | 0.002                       | 0.141 ± 0.003             | 0.0005 |
|                                | <i>Cyanidin 3-O-acetyl-Glc</i>               | 0.0046 ± 0.0003           | 0.002                       | 0.143 ± 0.003             | 0.004                       | 0.0158 ± 0.0002           | 0.001                       | 0.0771 ± 0.0002           | 0.002  |
|                                | <i>Petunidin 3-O-acetyl-Glc</i>              | 0.0184 ± 0.0007           | 0.0006                      | 0.593 ± 0.002             | 0.002                       | 0.045 ± 0.002             | 0.003                       | 0.245 ± 0.004             | 0.004  |
| <i>Peonidin 3-O-acetyl-Glc</i> | 0.158 ± 0.003                                | 0.001                     | 1.71 ± 0.03                 | 0.006                     | 0.3497 ± 0.0007             | 0.002                     | 0.911 ± 0.006               | 0.003                     |        |



Table S1. Cont.

|                                                                                  | 5                           |                           | 6                           |                           | 7                           |                           | 8                           |                           |
|----------------------------------------------------------------------------------|-----------------------------|---------------------------|-----------------------------|---------------------------|-----------------------------|---------------------------|-----------------------------|---------------------------|
|                                                                                  | Conc. (mg·L <sup>-1</sup> ) | LOQ (mg·L <sup>-1</sup> ) | Conc. (mg·L <sup>-1</sup> ) | LOQ (mg·L <sup>-1</sup> ) | Conc. (mg·L <sup>-1</sup> ) | LOQ (mg·L <sup>-1</sup> ) | Conc. (mg·L <sup>-1</sup> ) | LOQ (mg·L <sup>-1</sup> ) |
| <i>Malvidin 3-O-acetyl-Glc</i>                                                   | 0.55 ± 0.02                 | 0.003                     | 11.509 ± 0.101              | 0.04                      | 1.48 ± 0.02                 | 0.004                     | 3.259 ± 0.005               | 0.01                      |
| <i>Delphinidin 3-O-coumaroyl-Glc</i><br>( <i>cis-</i> and <i>trans-</i> isomers) | 0.01 ± 0.02                 | 0.001                     | 0.12 ± 0.04                 | 0.0009                    | 0.03 ± 0.02                 | 0.0006                    | 0.04 ± 0.02                 | 0.02                      |
| <i>Cyanidin 3-O-coumaroyl-Glc</i><br>( <i>cis-</i> and <i>trans-</i> isomers)    | 0.011 ± 0.006               | 0.0006                    | 0.08 ± 0.02                 | 0.003                     | 0.022 ± 0.007               | 0.002                     | 0.046 ± 0.005               | 0.0005                    |
| <i>Petunidin 3-O-coumaroyl-Glc</i><br>( <i>cis-</i> and <i>trans-</i> isomers)   | 0.033 ± 0.004               | 0.0004                    | 0.16 ± 0.03                 | 0.007                     | 0.0568 ± 0.0007             | 0.002                     | 0.1 ± 0.02                  | 0.005                     |
| <i>Peonidin 3-O-coumaroyl-Glc</i><br>( <i>cis-</i> and <i>trans-</i> isomers)    | 0.21 ± 0.06                 | 0.002                     | 0.5 ± 0.2                   | 0.006                     | 0.214 ± 0.003               | 0.0009                    | 0.34 ± 0.08                 | 0.002                     |
| <i>Malvidin 3-O-coumaroyl-Glc</i><br>( <i>cis-</i> and <i>trans-</i> isomers)    | 0.81 ± 0.02                 | 0.002                     | 2.5 ± 0.04                  | 0.03                      | 0.93 ± 0.02                 | 0.002                     | 1.15 ± 0.02                 | 0.004                     |
| <i>Delphinidin 3-O-caffeoyl-Glc</i>                                              | n.d.                        | 0.003                     | n.d.                        | 0.002                     | n.d.                        | 0.004                     | n.d.                        | 0.003                     |
| <i>Cyanidin 3-O-caffeoyl-Glc</i>                                                 | n.d.                        | 0.0004                    | 0.0006 ± 0.0002             | 0.002                     | n.d.                        | 0.0008                    | n.d.                        | 0.0008                    |
| <i>Petunidin 3-O-caffeoyl-Glc</i>                                                | n.d.                        | 0.0007                    | n.d.                        | 0.003                     | n.d.                        | 0.002                     | n.d.                        | 0.002                     |
| <i>Peonidin 3-O-caffeoyl-Glc</i>                                                 | 0.007 ± 0.007               | 0.004                     | 0.01 ± 0.02                 | 0.002                     | 0.005 ± 0.005               | 0.0007                    | 0.014 ± 0.008               | 0.0008                    |
| <i>Malvidin 3-O-caffeoyl-Glc</i>                                                 | 0.011 ± 0.006               | 0.0005                    | 0.03 ± 0.02                 | 0.02                      | 0.026 ± 0.005               | 0.0007                    | 0.025 ± 0.009               | 0.0008                    |
| <i>(epi)cat-ethyl-peonidin 3-O-Glc-1</i>                                         | n.d.                        | 0.002                     | n.d.                        | 0.003                     | n.d.                        | 0.002                     | n.d.                        | 0.004                     |
| <i>(epi)cat-ethyl-peonidin 3-O-Glc-2</i>                                         | n.d.                        | 0.002                     | n.d.                        | 0.003                     | n.d.                        | 0.002                     | n.d.                        | 0.004                     |
| <i>(epi)cat-ethyl-peonidin 3-O-Glc-3</i>                                         | n.d.                        | 0.002                     | n.d.                        | 0.003                     | n.d.                        | 0.002                     | n.d.                        | 0.004                     |
| <i>(epi)cat-ethyl-peonidin 3-O-Glc-4</i>                                         | n.d.                        | 0.002                     | n.d.                        | 0.003                     | n.d.                        | 0.002                     | n.d.                        | 0.004                     |
| <i>(epi)cat-ethyl-malvidin 3-O-Glc-1</i>                                         | n.d.                        | 0.002                     | 0.0003 ± 0.0006             | 0.002                     | 0.0001 ± 0.0002             | 0.002                     | 0.0002 ± 0.0003             | 0.004                     |
| <i>(epi)cat-ethyl-malvidin 3-O-Glc-2</i>                                         | n.d.                        | 0.002                     | 0.013 ± 0.002               | 0.002                     | 0.001 ± 0.002               | 0.002                     | n.d.                        | 0.004                     |
| <i>(epi)cat-ethyl-malvidin 3-O-Glc-3 and 4</i>                                   | n.d.                        | 0.002                     | 0.02 ± 0.006                | 0.002                     | 0.001 ± 0.003               | 0.002                     | 0.004 ± 0.007               | 0.004                     |
| <i>(epi)cat-ethyl-malvidin 3-O-coumaroyl-Glc (2 co-eluted isomers)</i>           | 0.0005 ± 0.001              | 0.0005                    | 0.03 ± 0.02                 | 0.0008                    | 0.0004 ± 0.0008             | 0.007                     | 0.001 ± 0.002               | 0.0006                    |
| <i>Delphinidin 3-O-Glc-(epi)cat</i>                                              | n.d.                        | 0.003                     | n.d.                        | 0.003                     | n.d.                        | 0.003                     | n.d.                        | 0.005                     |
| <i>Cyanidin 3-O-Glc-(epi)cat</i>                                                 | n.d.                        | 0.004                     | 0.003 ± 0.003               | 0.02                      | 0.0003 ± 0.0005             | 0.004                     | n.d.                        | 0.003                     |
| <i>Petunidin 3-O-Glc-(epi)cat</i>                                                | 0.002 ± 0.003               | 0.03                      | 0.015 ± 0.003               | 0.04                      | n.d.                        | 0.03                      | 0.004 ± 0.005               | 0.03                      |

Table S1. Cont.

|                                                        | 5                           |                           | 6                           |                           | 7                           |                           | 8                           |                           |
|--------------------------------------------------------|-----------------------------|---------------------------|-----------------------------|---------------------------|-----------------------------|---------------------------|-----------------------------|---------------------------|
|                                                        | Conc. (mg·L <sup>-1</sup> ) | LOQ (mg·L <sup>-1</sup> ) | Conc. (mg·L <sup>-1</sup> ) | LOQ (mg·L <sup>-1</sup> ) | Conc. (mg·L <sup>-1</sup> ) | LOQ (mg·L <sup>-1</sup> ) | Conc. (mg·L <sup>-1</sup> ) | LOQ (mg·L <sup>-1</sup> ) |
| <i>Peonidin 3-O-Glc-(epi)cat</i>                       | 0.012 ± 0.009               | 0.003                     | 0.02 ± 0.02                 | 0.002                     | 0.005 ± 0.003               | 0.002                     | 0.009 ± 0.002               | 0.003                     |
| <i>Malvidin 3-O-Glc-(epi)cat (2 isomers)</i>           | 0.092 ± 0.004               | 0.005                     | 0.279 ± 0.008               | 0.02                      | 0.03 ± 0.004                | 0.003                     | 0.077 ± 0.008               | 0.002                     |
| <i>Malvidin 3-O-coumaroyl-Glc-(epi)cat (2 isomers)</i> | 0.0002 ± 0.0001             | 0.002                     | 0.007 ± 0.003               | 0.03                      | 0.001 ± 0.002               | 0.005                     | 0.0011 ± 0.0005             | 0.002                     |
| <i>(epi)cat-delphinidin 3-O-Glc A-F bicyclic</i>       | n.d.                        | 0.004                     | 0.004 ± 0.002               | 0.0007                    | n.d.                        | 0.003                     | n.d.                        | 0.004                     |
| <i>(epi)cat-cyanidin 3-O-Glc A-F bicyclic</i>          | n.d.                        | 0.002                     | n.d.                        | 0.003                     | n.d.                        | 0.004                     | n.d.                        | 0.04                      |
| <i>(epi)cat-petunidin 3-O-Glc A-F bicyclic</i>         | n.d.                        | 0.002                     | n.d.                        | 0.002                     | n.d.                        | 0.003                     | n.d.                        | 0.005                     |
| <i>(epi)cat-peonidin 3-O-Glc A-F bicyclic</i>          | n.d.                        | 0.004                     | 0.001 ± 0.002               | 0.003                     | 0.003 ± 0.006               | 0.007                     | n.d.                        | 0.006                     |
| <i>(epi)cat-malvidin 3-O-Glc A-F bicyclic</i>          | 0.001 ± 0.002               | 0.004                     | 0.017 ± 0.009               | 0.06                      | 0.004 ± 0.007               | 0.003                     | 0.003 ± 0.004               | 0.002                     |
| <i>Caftaric-peonidin 3-O-Glc (2 isomers)</i>           | 0.069 ± 0.01                | 0.002                     | 0.011 ± 0.01                | 0.002                     | 0.002 ± 0.002               | 0.0008                    | 0.001 ± 0.001               | 0.003                     |
| <i>Caftaric-malvidin 3-O-Glc (2 isomers)</i>           | 0.16 ± 0.02                 | 0.002                     | 0.044 ± 0.006               | 0.08                      | 0.021 ± 0.003               | 0.003                     | 0.04 ± 0.02                 | 0.002                     |
| <i>Coutaric-malvidin 3-O-Glc (2 isomers)</i>           | n.d.                        | 0.002                     | n.d.                        | 0.002                     | n.d.                        | 0.04                      | n.d.                        | 0.03                      |
| <i>Pyranodelphinidin 3-O-Glc</i>                       | n.d.                        | 0.004                     | 0.001 ± 0.002               | 0.002                     | n.d.                        | 0.004                     | 0.001 ± 0.002               | 0.03                      |
| <i>Pyranocyanidin 3-O-Glc</i>                          | n.d.                        | 0.02                      | n.d.                        | 0.07                      | n.d.                        | 0.02                      | n.d.                        | 0.001                     |
| <i>Pyranopetunidin 3-O-Glc</i>                         | n.d.                        | 0.002                     | n.d.                        | 0.006                     | 0.0002 ± 0.0004             | 0.0005                    | 0.0002 ± 0.0003             | 0.0007                    |
| <i>Pyranopeonidin 3-O-Glc</i>                          | 0.002 ± 0.002               | 0.003                     | 0.004 ± 0.002               | 0.002                     | 0.001 ± 0.002               | 0.004                     | 0.004 ± 0.002               | 0.003                     |
| <i>Pyranomalvidin 3-O-Glc (vitisin B)</i>              | 0.01 ± 0.002                | 0.02                      | 0.073 ± 0.006               | 0.007                     | 0.004 ± 0.002               | 0.003                     | 0.048 ± 0.004               | 0.009                     |
| <i>Carboxypyranodelphinidin 3-O-Glc</i>                | n.d.                        | 0.0008                    | 0.016 ± 0.006               | 0.03                      | 0.0001 ± 0.0001             | 0.009                     | 0.012 ± 0.008               | 0.0008                    |
| <i>Carboxypyranocyanidin 3-O-Glc</i>                   | n.d.                        | 0.005                     | 0.003 ± 0.003               | 0.02                      | n.d.                        | 0.02                      | 0.003 ± 0.003               | 0.02                      |
| <i>Carboxypyranopetunidin 3-O-Glc</i>                  | 0.0026 ± 0.0008             | 0.0008                    | 0.008 ± 0.005               | 0.0007                    | n.d.                        | 0.02                      | 0.008 ± 0.005               | 0.03                      |
| <i>Carboxypyranopeonidin 3-O-Glc</i>                   | 0.015 ± 0.004               | 0.002                     | 0.017 ± 0.003               | 0.002                     | 0.0015 ± 0.0008             | 0.0005                    | 0.013 ± 0.0005              | 0.0003                    |
| <i>Carboxypyranomalvidin 3-O-Glc (vitisin A)</i>       | 0.131 ± 0.009               | 0.004                     | 0.32 ± 0.03                 | 0.005                     | 0.032 ± 0.008               | 0.002                     | 0.207 ± 0.007               | 0.005                     |
| <i>Pyranodelphinidin 3-O-acetyl-Glc</i>                | n.d.                        | 0.0003                    | 0.0001 ± 0.0001             | 0.0004                    | n.d.                        | 0.004                     | n.d.                        | 0.002                     |
| <i>Pyranocyanidin 3-O-acetyl-Glc</i>                   | 0.0002 ± 0.0004             | 0.0008                    | 0.0004 ± 0.0004             | 0.002                     | n.d.                        | 0.0006                    | 0.0003 ± 0.0001             | 0.0007                    |
| <i>Pyranopetunidin 3-O-acetyl-Glc</i>                  | n.d.                        | 0.0005                    | n.d.                        | 0.0008                    | 0.0001 ± 0.0001             | 0.0007                    | n.d.                        | 0.0003                    |
| <i>Pyranopeonidin 3-O-acetyl-Glc</i>                   | n.d.                        | 0.0006                    | n.d.                        | 0.002                     | 0.0001 ± 0.0002             | 0.002                     | n.d.                        | 0.0008                    |
| <i>Pyranomalvidin 3-O-acetyl-Glc</i>                   | 0.001 ± 0.002               | 0.0003                    | 0.03 ± 0.002                | 0.0002                    | n.d.                        | 0.002                     | 0.003 ± 0.005               | 0.002                     |

Table S1. Cont.

|                                                        | 5                           |                           | 6                           |                           | 7                           |                           | 8                           |                           |
|--------------------------------------------------------|-----------------------------|---------------------------|-----------------------------|---------------------------|-----------------------------|---------------------------|-----------------------------|---------------------------|
|                                                        | Conc. (mg·L <sup>-1</sup> ) | LOQ (mg·L <sup>-1</sup> ) | Conc. (mg·L <sup>-1</sup> ) | LOQ (mg·L <sup>-1</sup> ) | Conc. (mg·L <sup>-1</sup> ) | LOQ (mg·L <sup>-1</sup> ) | Conc. (mg·L <sup>-1</sup> ) | LOQ (mg·L <sup>-1</sup> ) |
| <i>Carboxypyranodelphinidin 3-O-acetyl-Glc</i>         | 0 ± 0.0001                  | 0.0008                    | 0.001 ± 0.002               | 0.0007                    | n.d.                        | 0.0008                    | n.d.                        | 0.0007                    |
| <i>Carboxypyranocyanidin 3-O-acetyl-Glc</i>            | 0.0005 ± 0.0004             | 0.02                      | 0.001 ± 0.0006              | 0.0006                    | 0.0003 ± 0.0003             | 0.0006                    | 0.0003 ± 0.0001             | 0.02                      |
| <i>Carboxypyranopetunidin 3-O-acetyl-Glc</i>           | n.d.                        | 0.0006                    | 0.0036 ± 0.0006             | 0.0002                    | n.d.                        | 0.0006                    | 0.001 ± 0.002               | 0.0003                    |
| <i>Carboxypyranopeonidin 3-O-acetyl-Glc</i>            | 0.001 ± 0.002               | 0.004                     | 0.03 ± 0.02                 | 0.03                      | 0.0009 ± 0.0009             | 0.008                     | 0.01 ± 0.02                 | 0.004                     |
| <i>Carboxypyranomalvidin 3-O-acetyl-Glc</i>            | 0.007 ± 0.003               | 0.0006                    | 0.17 ± 0.03                 | 0.002                     | 0.002 ± 0.003               | 0.0009                    | 0.04 ± 0.02                 | 0.002                     |
| <i>Pyranopetunidin 3-O-coumaroyl-Glc</i>               | n.d.                        | 0.002                     | n.d.                        | 0.0003                    | n.d.                        | 0.0008                    | n.d.                        | 0.0006                    |
| <i>Pyranopeonidin 3-O-coumaroyl-Glc</i>                | n.d.                        | 0.002                     | 0.005 ± 0.004               | 0.0003                    | n.d.                        | 0.002                     | 0.001 ± 0.002               | 0.002                     |
| <i>Pyranomalvidin 3-O-coumaroyl-Glc</i>                | n.d.                        | 0.002                     | 0.02 ± 0.02                 | 0.002                     | n.d.                        | 0.002                     | 0.006 ± 0.005               | 0.0005                    |
| <i>Carboxypyranopetunidin 3-O-coumaroyl-Glc</i>        | n.d.                        | 0.0008                    | 0.002 ± 0.002               | 0.001                     | n.d.                        | 0.001                     | 0.001 ± 0.002               | 0.002                     |
| <i>Carboxypyranopeonidin 3-O-coumaroyl-Glc</i>         | 0.004 ± 0.004               | 0.0007                    | 0.012 ± 0.009               | 0.004                     | 0.0005 ± 0.0006             | 0.0004                    | 0.002 ± 0.003               | 0.0007                    |
| <i>Carboxypyranomalvidin 3-O-coumaroyl-Glc</i>         | 0.007 ± 0.006               | 0.003                     | 0.05 ± 0.03                 | 0.002                     | 0.004 ± 0.004               | 0.0003                    | 0.012 ± 0.006               | 0.007                     |
| <i>p-hydroxyphenylpyranopeonidin 3-O-Glc</i>           | 0.015 ± 0.01                | 0.04                      | 0.0019 ± 0.0007             | 0.008                     | 0.002 ± 0.003               | 0.0002                    | 0.011 ± 0.006               | 0.02                      |
| <i>p-hydroxyphenylpyranomalvidin 3-O-Glc</i>           | 0.13 ± 0.02                 | 0.0003                    | 0.07 ± 0.03                 | 0.0003                    | 0.034 ± 0.013               | 0.0003                    | 0.14 ± 0.04                 | 0.0002                    |
| <i>p-hydroxyphenylpyranopeonidin 3-O-acetyl-Glc</i>    | 0.001 ± 0.001               | 0.0003                    | 0.003 ± 0.002               | 0.0003                    | 0.001 ± 0.002               | 0.0002                    | 0.007 ± 0.004               | 0.0002                    |
| <i>p-hydroxyphenylpyranomalvidin 3-O-acetyl-Glc</i>    | 0.008 ± 0.004               | 0.0002                    | 0.03 ± 0.007                | 0.0004                    | 0.011 ± 0.005               | 0.0004                    | 0.033 ± 0.009               | 0.0002                    |
| <i>p-hydroxyphenylpyranopeonidin 3-O-coumaroyl-Glc</i> | 0.003 ± 0.002               | 0.0004                    | 0.003 ± 0.001               | 0.0004                    | 0.003 ± 0.003               | 0.0004                    | 0.003 ± 0.002               | 0.0003                    |
| <i>p-hydroxyphenylpyranomalvidin 3-O-coumaroyl-Glc</i> | 0.03 ± 0.02                 | 0.0003                    | 0.016 ± 0.008               | 0.0002                    | 0.015 ± 0.004               | 0.0002                    | 0.021 ± 0.01                | 0.0003                    |
| <i>Catechylpyranopeonidin 3-O-Glc</i>                  | 0.023 ± 0.008               | 0.0002                    | 0.008 ± 0.005               | 0.004                     | 0.008 ± 0.001               | 0.0003                    | 0.03 ± 0.02                 | 0.002                     |
| <i>Catechylpyranomalvidin 3-O-Glc (pinotin A)</i>      | 0.094 ± 0.021               | 0.0007                    | 0.12 ± 0.02                 | 0.0006                    | 0.06 ± 0.005                | 0.0003                    | 0.14 ± 0.03                 | 0.0004                    |
| <i>Catechylpyranopetunidin 3-O-acetyl-Glc</i>          | 0.001 ± 0.003               | 0.0002                    | 0.002 ± 0.002               | 0.0004                    | n.d.                        | 0.0004                    | 0.002 ± 0.003               | 0.0003                    |

Anthocyanins

Table S1. Cont.

|                                                  | 5                           |                           | 6                           |                           | 7                           |                           | 8                           |                           |
|--------------------------------------------------|-----------------------------|---------------------------|-----------------------------|---------------------------|-----------------------------|---------------------------|-----------------------------|---------------------------|
|                                                  | Conc. (mg·L <sup>-1</sup> ) | LOQ (mg·L <sup>-1</sup> ) | Conc. (mg·L <sup>-1</sup> ) | LOQ (mg·L <sup>-1</sup> ) | Conc. (mg·L <sup>-1</sup> ) | LOQ (mg·L <sup>-1</sup> ) | Conc. (mg·L <sup>-1</sup> ) | LOQ (mg·L <sup>-1</sup> ) |
| <i>Catechylpyranopeonidin 3-O-acetyl-Glc</i>     | 0.001 ± 0.002               | 0.0002                    | 0.006 ± 0.005               | 0.0003                    | 0.002 ± 0.001               | 0.0002                    | 0.006 ± 0.004               | 0.0003                    |
| <i>Catechylpyranomalvidin 3-O-acetyl-Glc</i>     | 0.004 ± 0.004               | 0.0005                    | 0.083 ± 0.008               | 0.02                      | 0.013 ± 0.005               | 0.0003                    | 0.0366 ± 0.0004             | 0.0003                    |
| <i>Catechylpyranopetunidin 3-O-coumaroyl-Glc</i> | 0 ± 0.001                   | 0.0002                    | 0 ± 0.001                   | 0.0002                    | 0.0002 ± 0.0004             | 0.0002                    | 0.002 ± 0.004               | 0.002                     |
| <i>Catechylpyranopeonidin 3-O-coumaroyl-Glc</i>  | 0.004 ± 0.003               | 0.0002                    | 0.002 ± 0.003               | 0.0005                    | 0.0024 ± 0.0006             | 0.0004                    | 0.009 ± 0.007               | 0.0002                    |
| <i>Catechylpyranomalvidin 3-O-coumaroyl-Glc</i>  | 0.012 ± 0.006               | 0.002                     | 0.028 ± 0.005               | 0.0003                    | 0.034 ± 0.006               | 0.0002                    | 0.04 ± 0.02                 | 0.005                     |
| <i>Guaiacylpyranomalvidin 3-O-Glc</i>            | 0.073 ± 0.008               | 0.0005                    | 0.022 ± 0.003               | 0.006                     | 0.02 ± 0.005                | 0.0005                    | 0.06 ± 0.02                 | 0.0007                    |
| <i>Guaiacylpyranomalvidin 3-O-acetyl-Glc</i>     | 0.003 ± 0.002               | 0.0005                    | 0.007 ± 0.003               | 0.0004                    | 0.005 ± 0.003               | 0.0004                    | 0.017 ± 0.006               | 0.0003                    |
| <i>Guaiacylpyranomalvidin 3-O-coumaroyl-Glc</i>  | 0.008 ± 0.006               | 0.0004                    | 0.003 ± 0.003               | 0.0004                    | 0.007 ± 0.006               | 0.0004                    | 0.005 ± 0.005               | 0.0004                    |
| Anthocyanins                                     |                             |                           |                             |                           |                             |                           |                             |                           |
| <i>Syringylpyranomalvidin 3-O-Glc</i>            | 0.0005 ± 0.0008             | 0.0008                    | n.d.                        | 0.008                     | n.d.                        | 0.0009                    | 0.001 ± 0.001               | 0.002                     |
| <i>Petunidin 3-O-acetyl-Glc-(epi)cat</i>         | n.d.                        | 0.004                     | n.d.                        | 0.002                     | n.d.                        | 0.003                     | n.d.                        | 0.003                     |
| <i>Peonidin 3-O-acetyl-Glc-(epi)cat</i>          | n.d.                        | 0.003                     | 0.006 ± 0.005               | 0.004                     | n.d.                        | 0.003                     | n.d.                        | 0.003                     |
| <i>Malvidin 3-O-acetyl-Glc-(epi)cat</i>          | n.d.                        | 0.002                     | 0.04 ± 0.02                 | 0.002                     | n.d.                        | 0.0007                    | 0.005 ± 0.005               | 0.0005                    |
| <i>Pyranopeonidin 3-O-Glc-(epi)cat</i>           | 0.0012 ± 0.0004             | 0.0006                    | 0.0011 ± 0.0001             | 0.0005                    | 0.0003 ± 0.0001             | 0.0008                    | n.d.                        | 0.002                     |
| <i>Pyranomalvidin 3-O-Glc-(epi)cat</i>           | 0.003 ± 0.003               | 0.003                     | 0.003 ± 0.003               | 0.0002                    | n.d.                        | 0.0002                    | n.d.                        | 0.0003                    |
| <i>Pyranomalvidin 3-O-coumaroyl-Glc-(epi)cat</i> | 0.004 ± 0.005               | 0.05                      | 0 ± 0.001                   | 0.0009                    | n.d.                        | 0.002                     | n.d.                        | 0.009                     |
| <i>Unknown "551"</i>                             | 0.001 ± 0.002               | 0.004                     | 0.001 ± 0.002               | 0.002                     | 0.0004 ± 0.0008             | 0.0004                    | 0.004 ± 0.007               | 0.0006                    |
| <i>Unknown "581"</i>                             | 0.03 ± 0.02                 | 0.002                     | 0.04 ± 0.03                 | 0.002                     | 0.009 ± 0.008               | 0.002                     | 0.09 ± 0.04                 | 0.002                     |
| <i>Unknown "1095"</i>                            | n.d.                        | 0.02                      | n.d.                        | 0.01                      | n.d.                        | 0.03                      | n.d.                        | 0.03                      |
| <i>Unknown "1099"</i>                            | n.d.                        | 0.01                      | 0.002 ± 0.0007              | < 0.002                   | 0.0004 ± 0.0007             | < 0.002                   | 0.0008 ± 0.0008             | < 0.002                   |
| <i>Tyrosine</i>                                  | 10.4 ± 0.2                  | 0.6                       | 4.37 ± 0.07                 | 0.2                       | 5.91 ± 0.05                 | 0.4                       | 5.74 ± 0.06                 | 0.3                       |
| <i>Tyrosol</i>                                   | 7.85 ± 0.09                 | 6                         | 18.9 ± 0.5                  | 0.9                       | 15.01 ± 0.09                | 2                         | 15.2 ± 0.3                  | 2                         |
| Others (aminoacids and alcohols)                 |                             |                           |                             |                           |                             |                           |                             |                           |
| <i>Hydroxytyrosol</i>                            | 1.1 ± 0.08                  | 0.04                      | 0.44 ± 0.05                 | 0.03                      | 0.07 ± 0.02                 | 0.04                      | 0.261 ± 0.005               | 0.03                      |
| <i>Tryptophol</i>                                | 0.4 ± 0.2                   | 0.3                       | 1.2 ± 0.5                   | 0.2                       | 0.3 ± 0.2                   | 0.3                       | 0.04 ± 0.03                 | 0.2                       |
| <i>Tryptophan</i>                                | 1.4 ± 0.3                   | 0                         | 0.65 ± 0.1                  | 0                         | 0.4 ± 0.2                   | 0                         | 0.3 ± 0.2                   | 0                         |

Table S1. Cont.

|                                          |                                                | 9                           |                           | 10                          |                           | 11                          |                           | 12                          |                           |
|------------------------------------------|------------------------------------------------|-----------------------------|---------------------------|-----------------------------|---------------------------|-----------------------------|---------------------------|-----------------------------|---------------------------|
|                                          |                                                | Conc. (mg·L <sup>-1</sup> ) | LOQ (mg·L <sup>-1</sup> ) | Conc. (mg·L <sup>-1</sup> ) | LOQ (mg·L <sup>-1</sup> ) | Conc. (mg·L <sup>-1</sup> ) | LOQ (mg·L <sup>-1</sup> ) | Conc. (mg·L <sup>-1</sup> ) | LOQ (mg·L <sup>-1</sup> ) |
| Benzoic acids<br>and derivatives         | <i>Gallic acid</i>                             | 5.3 ± 0.2                   | 0.03                      | 3.43 ± 0.09                 | 0.2                       | 21.1 ± 0.5                  | 0.1                       | 1.03 ± 0.02                 | 0.07                      |
|                                          | <i>Protocatechuic acid</i>                     | 3 ± 0.3                     | 0.2                       | 1.39 ± 0.03                 | 0.07                      | 0.71 ± 0.06                 | 0.02                      | 0.641 ± 0.003               | 0.03                      |
|                                          | <i>Syringic acid</i>                           | 1.6 ± 0.2                   | 0.06                      | 1.24 ± 0.04                 | 0.03                      | 0.29 ± 0.02                 | 0.04                      | 0.407 ± 0.006               | 0.05                      |
|                                          | <i>Vanillic acid</i>                           | 1.41 ± 0.07                 | 0.2                       | 1.1 ± 0.2                   | 0.2                       | 0.49 ± 0.02                 | 0.2                       | 0.4 ± 0.02                  | 0.08                      |
|                                          | <i>Ethyl gallate</i>                           | 0.7 ± 0.3                   | 0.02                      | 0.5 ± 0.3                   | 0.007                     | 4 ± 0.4                     | 0.008                     | 0.14 ± 0.05                 | 0.006                     |
|                                          | <i>Ethyl protocatechuate</i>                   | 0.5 ± 0.2                   | <0.02                     | 0.2 ± 0.2                   | <0.02                     | 0.06 ± 0.04                 | <0.02                     | 0.07 ± 0.03                 | <0.02                     |
| Hydroxycinnamic acids<br>and derivatives | <i>Caffeic acid</i>                            | 2.5 ± 0.3                   | 0.2                       | 1.1 ± 0.1                   | 0.03                      | 2.1 ± 0.4                   | 0.2                       | 3.1 ± 0.3                   | 0.08                      |
|                                          | <i>p-coumaric acid</i>                         | 2.8 ± 0.5                   | 0.4                       | 1 ± 0.2                     | 0.2                       | 0.52 ± 0.08                 | 0.6                       | 1.1 ± 0.3                   | 0.3                       |
|                                          | <i>Ferulic acid</i>                            | 0.48 ± 0.07                 | 0.04                      | 0.3 ± 0.2                   | 0.5                       | 0.2 ± 0.2                   | 0.04                      | 0.2 ± 0.2                   | 0.04                      |
|                                          | <i>Caftaric acid (cis- and trans- isomers)</i> | 6.4 ± 0.3                   | 0.4                       | 19.4 ± 0.6                  | 0.3                       | 16.4 ± 0.7                  | 0.2                       | 30.1 ± 0.5                  | 0.3                       |
|                                          | <i>Coutaric acid (cis- and trans- isomers)</i> | 2.64 ± 0.04                 | 0.04                      | 14.4 ± 0.8                  | 0.02                      | 5.5 ± 0.5                   | 0.09                      | 7.1 ± 0.4                   | 0.03                      |
|                                          | <i>Fertaric acid</i>                           | 3.49 ± 0.09                 | 0.007                     | 6.7 ± 0.2                   | 0.006                     | 4 ± 0.4                     | 0.02                      | 6.39 ± 0.07                 | 0.009                     |
|                                          | <i>GRP (cis- and trans- isomers)</i>           | 1.9 ± 0.5                   | 0.3                       | 23 ± 2                      | 0.4                       | 12 ± 2                      | 0.05                      | 20 ± 2                      | 0.08                      |
|                                          | <i>Ethyl caffeate</i>                          | 0.67 ± 0.03                 | 0.03                      | 0.18 ± 0.03                 | 0.007                     | 0.68 ± 0.06                 | 0.08                      | 0.97 ± 0.09                 | 0.07                      |
|                                          | <i>Ethyl coumarate</i>                         | 0.6 ± 0.2                   | 0.03                      | 0.24 ± 0.06                 | 0.03                      | 0.09 ± 0.03                 | 0.02                      | 0.18 ± 0.02                 | 0.006                     |
| <i>viniferin-1</i>                       | <i>trans-resveratrol</i>                       | 0.37 ± 0.05                 | 0.05                      | 0.228 ± 0.007               | 0.03                      | 0.14 ± 0.03                 | 0.02                      | 0.112 ± 0.008               | 0.03                      |
|                                          | <i>cis-resveratrol</i>                         | 0.68 ± 0.03                 | 0.05                      | 0.17 ± 0.02                 | 0.05                      | 0.23 ± 0.02                 | 0.02                      | 0.12 ± 0.03                 | 0.03                      |
|                                          |                                                | 0.06 ± 0.03                 | 0.6                       | 0.0233 ± 0.0007             | 0.09                      | 0.1 ± 0.04                  | 0.2                       | 0.1 ± 0.04                  | 0.3                       |
|                                          | <i>viniferin-2</i>                             | 0.03 ± 0.02                 | 0.05                      | 0.02 ± 0.002                | 0.03                      | n.d.                        | 0.02                      | 0.023 ± 0.002               | 0.03                      |
|                                          | <i>trans-piceid</i>                            | 0.56 ± 0.08                 | 0.7                       | 0.33 ± 0.04                 | 0.4                       | 0.21 ± 0.03                 | 0.8                       | 0.19 ± 0.05                 | 0.8                       |
|                                          | <i>cis-piceid</i>                              | 1.84 ± 0.1                  | 0.2                       | 1.4 ± 0.2                   | 0.2                       | 0.62 ± 0.06                 | 0.05                      | 0.52 ± 0.02                 | 0.05                      |
| Flavonols                                | <i>Quercetin Glc</i>                           | 0.01 ± 0.005                | 0.04                      | n.d.                        | 0.02                      | 0.008 ± 0.005               | 0.0009                    | n.d.                        | 0.02                      |
|                                          | <i>Myricetin glucuronide</i>                   | 0.06 ± 0.02                 | 0.3                       | 0.15 ± 0.05                 | 0.9                       | 0.009 ± 0.004               | 0.03                      | 0.001 ± 0.002               | 0.03                      |
|                                          | <i>Myricetin Glc</i>                           | 0.012 ± 0.007               | 0.005                     | 0.08 ± 0.04                 | 0.0008                    | 0.003 ± 0.003               | 0.002                     | 0.003 ± 0.002               | 0.006                     |
|                                          | <i>Quercetin glucuronide</i>                   | 0.008 ± 0.005               | 0.006                     | 0.554 ± 0.009               | 0.002                     | 0.1 ± 0.02                  | 0.006                     | 0.0055 ± 0.0006             | 0.0007                    |
|                                          | <i>Quercetin</i>                               | n.d.                        | 0.02                      | n.d.                        | 0.2                       | n.d.                        | 0.04                      | n.d.                        | 0.03                      |

Table S1. Cont.

|                                |                                              | 9                           |                           | 10                          |                           | 11                          |                           | 12                          |                           |
|--------------------------------|----------------------------------------------|-----------------------------|---------------------------|-----------------------------|---------------------------|-----------------------------|---------------------------|-----------------------------|---------------------------|
|                                |                                              | Conc. (mg·L <sup>-1</sup> ) | LOQ (mg·L <sup>-1</sup> ) | Conc. (mg·L <sup>-1</sup> ) | LOQ (mg·L <sup>-1</sup> ) | Conc. (mg·L <sup>-1</sup> ) | LOQ (mg·L <sup>-1</sup> ) | Conc. (mg·L <sup>-1</sup> ) | LOQ (mg·L <sup>-1</sup> ) |
| Flavan-3-ols                   | <i>Catechin</i>                              | 8.4 ± 0.8                   | 0.2                       | 4.4 ± 0.3                   | 0.08                      | 5.8 ± 0.5                   | 0.2                       | 2.59 ± 0.05                 | 0.04                      |
|                                | <i>Galloylated dimer</i>                     | n.d.                        | <0.002                    | n.d.                        | <0.002                    | n.d.                        | <0.002                    | n.d.                        | <0.002                    |
|                                | <i>Trimer-1 (1 isomer)</i>                   | 0.2 ± 0.07                  | <0.007                    | 0.08 ± 0.02                 | <0.007                    | 0.002 ± 0.003               | <0.007                    | 0.002 ± 0.004               | <0.007                    |
|                                | <i>Trimers-2 (several isomers)</i>           | 0.24 ± 0.04                 | 0.04                      | 0.08 ± 0.02                 | 0.07                      | 0.1 ± 0.03                  | 0.05                      | 0.0004 ± 0.0007             | <0.002                    |
|                                | <i>(epi)cat-ethyl-(epi)cat-1 (1 isomer)</i>  | n.d.                        | <0.08                     | n.d.                        | <0.08                     | n.d.                        | 0.08                      | n.d.                        | <0.08                     |
|                                | <i>(epi)cat-ethyl-(epi)cat-2 (2 isomers)</i> | n.d.                        | 0.002                     | n.d.                        | 0.0007                    | n.d.                        | <0.0007                   | n.d.                        | 0.02                      |
|                                | <i>Epicatechin</i>                           | 7 ± 3                       | 2                         | 1.04 ± 0.05                 | 0.6                       | 3 ± 2                       | 0.6                       | 0.6 ± 0.2                   | 0.2                       |
|                                | <i>Dimer B2</i>                              | 2.37 ± 0.35                 | 0.06                      | 0.61 ± 0.04                 | 0.02                      | 0.3 ± 0.02                  | 0.07                      | 0.11 ± 0.03                 | 0.03                      |
|                                | <i>Dimer B1</i>                              | 9.22 ± 0.09                 | 0.05                      | 5.52 ± 0.07                 | 0.02                      | 0.99 ± 0.02                 | 0.08                      | 1.84 ± 0.05                 | 0.02                      |
|                                | <i>Dimer B3</i>                              | 1.23 ± 0.09                 | 0.3                       | 0.25 ± 0.03                 | 0.2                       | 0.16 ± 0.02                 | 0.03                      | 0.06 ± 0.02                 | 0.03                      |
| <i>Dimer B4</i>                | 1.8 ± 0.3                                    | 0.4                         | 0.15 ± 0.1                | 0.4                         | 0.106 ± 0.009             | 0.08                        | 0.02 ± 0.02               | 0.06                        |                           |
| Dihydroflavonols               | <i>Astilbin</i>                              | 0.31 ± 0.04                 | 0.002                     | 0.08 ± 0.03                 | 0.006                     | 0.61 ± 0.03                 | 0.02                      | 0.3 ± 0.02                  | 0.003                     |
|                                | <i>Taxifolin</i>                             | 0.5 ± 0.2                   | 0.3                       | 0.12 ± 0.02                 | 0.4                       | 0.32 ± 0.02                 | 0.1                       | 0.23 ± 0.02                 | 0.2                       |
| Anthocyanins                   | <i>Malvidin 3,5-diGlc</i>                    | 0.08 ± 0.02                 | 2                         | 0.08 ± 0.02                 | 0.9                       | n.d.                        | 0.03                      | n.d.                        | 0.1                       |
|                                | <i>Delphinidin 3,5-diGlc</i>                 | n.d.                        | 0.02                      | 0.029 ± 0.003               | 0.02                      | n.d.                        | 0.02                      | n.d.                        | 0.02                      |
|                                | <i>Cyanidin 3,5-diGlc</i>                    | 0.021 ± 0.004               | 0.04                      | 0.0175 ± 0.0004             | 0.02                      | n.d.                        | 0.02                      | n.d.                        | 0.02                      |
|                                | <i>Petunidin 3,5-diGlc</i>                   | n.d.                        | 0.02                      | n.d.                        | 0.03                      | n.d.                        | 0.02                      | n.d.                        | 0.02                      |
|                                | <i>Peonidin 3,5-diGlc</i>                    | 0.05 ± 0.02                 | 0.3                       | 0.043 ± 0.006               | 0.2                       | n.d.                        | 0.02                      | n.d.                        | 0.04                      |
|                                | <i>Malvidin 3-O-Glc</i>                      | 13.3 ± 0.3                  | 0.06                      | 11.8 ± 0.2                  | 0.05                      | 0.079 ± 0.007               | 0.005                     | 0.731 ± 0.007               | 0.02                      |
|                                | <i>Delphinidin 3-O-Glc</i>                   | 0.19 ± 0.007                | 0.003                     | 0.422 ± 0.009               | 0.006                     | 0.0018 ± 0.0009             | 0.004                     | 0.0014 ± 0.0007             | 0.002                     |
|                                | <i>Cyanidin 3-O-Glc</i>                      | 0.0395 ± 0.0009             | 0.003                     | 0.031 ± 0.004               | 0.003                     | 0.0004 ± 0.0001             | 0.0008                    | 0.00144 ± 0.00007           | 0.002                     |
|                                | <i>Petunidin 3-O-Glc</i>                     | 0.78 ± 0.1                  | 0.03                      | 1.61 ± 0.07                 | 0.05                      | 0.0022 ± 0.0008             | 0.01                      | 0.013 ± 0.003               | 0.0006                    |
|                                | <i>Peonidin 3-O-Glc</i>                      | 1.04 ± 0.02                 | 0.02                      | 0.43 ± 0.02                 | 0.03                      | 0.015 ± 0.002               | 0.003                     | 0.074 ± 0.01                | 0.004                     |
|                                | <i>Delphinidin 3-O-acetyl-Glc</i>            | 0.094 ± 0.003               | 0.004                     | 0.085 ± 0.006               | 0.001                     | 0.0004 ± 0.0005             | 0.0008                    | 0.0004 ± 0.0004             | 0.002                     |
|                                | <i>Cyanidin 3-O-acetyl-Glc</i>               | 0.0731 ± 0.0006             | 0.003                     | 0.037 ± 0.002               | 0.0009                    | n.d.                        | 0.002                     | 0.0014 ± 0.0003             | 0.0006                    |
|                                | <i>Petunidin 3-O-acetyl-Glc</i>              | 0.209 ± 0.005               | 0.002                     | 0.1281 ± 0.0005             | 0.003                     | 0.0002 ± 0.0005             | 0.002                     | 0.0028 ± 0.0004             | 0.0008                    |
| <i>Peonidin 3-O-acetyl-Glc</i> | 1.23 ± 0.03                                  | 0.002                       | 0.222 ± 0.008             | 0.0009                      | 0 ± 0.001                 | 0.0003                      | 0.059 ± 0.003             | 0.0007                      |                           |

Table S1. Cont.

|                                                                                  | 9                           |                           | 10                          |                           | 11                          |                           | 12                          |                           |
|----------------------------------------------------------------------------------|-----------------------------|---------------------------|-----------------------------|---------------------------|-----------------------------|---------------------------|-----------------------------|---------------------------|
|                                                                                  | Conc. (mg·L <sup>-1</sup> ) | LOQ (mg·L <sup>-1</sup> ) | Conc. (mg·L <sup>-1</sup> ) | LOQ (mg·L <sup>-1</sup> ) | Conc. (mg·L <sup>-1</sup> ) | LOQ (mg·L <sup>-1</sup> ) | Conc. (mg·L <sup>-1</sup> ) | LOQ (mg·L <sup>-1</sup> ) |
| <i>Malvidin 3-O-acetyl-Glc</i>                                                   | 6 ± 0.2                     | 0.02                      | 1.29 ± 0.03                 | 0.01                      | 0.0012 ± 0.0005             | 0.002                     | 0.169 ± 0.004               | 0.003                     |
| <i>Delphinidin 3-O-coumaroyl-Glc</i><br>( <i>cis-</i> and <i>trans-</i> isomers) | 0.021 ± 0.008               | 0.008                     | 0.14 ± 0.03                 | 0.009                     | 0.001 ± 0.003               | 0.0006                    | 0.0002 ± 0.0004             | 0.002                     |
| <i>Cyanidin 3-O-coumaroyl-Glc</i><br>( <i>cis-</i> and <i>trans-</i> isomers)    | 0.029 ± 0.008               | 0.003                     | 0.08 ± 0.02                 | 0.004                     | n.d.                        | 0.0004                    | 0.001 ± 0.002               | 0.0004                    |
| <i>Petunidin 3-O-coumaroyl-Glc</i><br>( <i>cis-</i> and <i>trans-</i> isomers)   | 0.051 ± 0.003               | 0.0006                    | 0.21 ± 0.02                 | 0.009                     | 0.001 ± 0.002               | 0.0002                    | 0.0021 ± 0.001              | 0.0003                    |
| <i>Peonidin 3-O-coumaroyl-Glc</i><br>( <i>cis-</i> and <i>trans-</i> isomers)    | 0.23 ± 0.05                 | 0.006                     | 0.32 ± 0.02                 | 0.005                     | 0.0005 ± 0.0002             | 0.0003                    | 0.025 ± 0.005               | 0.002                     |
| <i>Malvidin 3-O-coumaroyl-Glc</i><br>( <i>cis-</i> and <i>trans-</i> isomers)    | 1.29 ± 0.02                 | 0.04                      | 1.96 ± 0.05                 | 0.02                      | 0.003 ± 0.002               | 0.0006                    | 0.079 ± 0.002               | 0.002                     |
| <i>Delphinidin 3-O-caffeoyl-Glc</i>                                              | n.d.                        | 0.003                     | n.d.                        | 0.003                     | n.d.                        | 0.003                     | n.d.                        | 0.003                     |
| <i>Cyanidin 3-O-caffeoyl-Glc</i>                                                 | 0.003 ± 0.005               | 0.001                     | n.d.                        | 0.0008                    | n.d.                        | 0.003                     | n.d.                        | 0.0007                    |
| <i>Petunidin 3-O-caffeoyl-Glc</i>                                                | n.d.                        | 0.002                     | n.d.                        | 0.002                     | n.d.                        | 0.0006                    | n.d.                        | 0.002                     |
| <i>Peonidin 3-O-caffeoyl-Glc</i>                                                 | 0.04 ± 0.03                 | 0.006                     | 0.018 ± 0.01                | 0.0007                    | n.d.                        | 0.003                     | n.d.                        | 0.002                     |
| <i>Malvidin 3-O-caffeoyl-Glc</i>                                                 | 0.09 ± 0.04                 | 0.05                      | 0.075 ± 0.009               | 0.002                     | n.d.                        | 0.0009                    | 0.0003 ± 0.0006             | 0.002                     |
| <i>(epi)cat-ethyl-peonidin 3-O-Glc-1</i>                                         | n.d.                        | 0.004                     | n.d.                        | 0.0008                    | n.d.                        | 0.003                     | n.d.                        | 0.005                     |
| <i>(epi)cat-ethyl-peonidin 3-O-Glc-2</i>                                         | n.d.                        | 0.004                     | n.d.                        | 0.0008                    | n.d.                        | 0.003                     | n.d.                        | 0.005                     |
| <i>(epi)cat-ethyl-peonidin 3-O-Glc-3</i>                                         | n.d.                        | 0.004                     | n.d.                        | 0.0008                    | 0.002 ± 0.003               | 0.003                     | n.d.                        | 0.005                     |
| <i>(epi)cat-ethyl-peonidin 3-O-Glc-4</i>                                         | n.d.                        | 0.004                     | n.d.                        | 0.0008                    | n.d.                        | 0.003                     | n.d.                        | 0.005                     |
| <i>(epi)cat-ethyl-malvidin 3-O-Glc-1</i>                                         | n.d.                        | 0.002                     | 0.00005 ± 0.00009           | 0.002                     | 0.001 ± 0.002               | 0.002                     | n.d.                        | 0.004                     |
| <i>(epi)cat-ethyl-malvidin 3-O-Glc-2</i>                                         | n.d.                        | 0.002                     | 0.014 ± 0.006               | 0.002                     | 0.012 ± 0.009               | 0.002                     | n.d.                        | 0.004                     |
| <i>(epi)cat-ethyl-malvidin 3-O-Glc-3 and 4</i>                                   | 0.01 ± 0.02                 | 0.002                     | 0.051 ± 0.008               | 0.002                     | 0.03 ± 0.03                 | 0.002                     | n.d.                        | 0.004                     |
| <i>(epi)cat-ethyl-malvidin 3-O-coumaroyl-Glc</i> (2 <i>co-eluted isomers</i> )   | 0.003 ± 0.005               | 0.005                     | 0.02 ± 0.01                 | 0.0005                    | 0.001 ± 0.002               | 0.02                      | n.d.                        | 0.0006                    |
| <i>Delphinidin 3-O-Glc-(epi)cat</i>                                              | n.d.                        | 0.002                     | n.d.                        | 0.002                     | n.d.                        | 0.004                     | n.d.                        | 0.004                     |

Table S1. Cont.

|                                                        | 9                           |                           | 10                          |                           | 11                          |                           | 12                          |                           |
|--------------------------------------------------------|-----------------------------|---------------------------|-----------------------------|---------------------------|-----------------------------|---------------------------|-----------------------------|---------------------------|
|                                                        | Conc. (mg·L <sup>-1</sup> ) | LOQ (mg·L <sup>-1</sup> ) | Conc. (mg·L <sup>-1</sup> ) | LOQ (mg·L <sup>-1</sup> ) | Conc. (mg·L <sup>-1</sup> ) | LOQ (mg·L <sup>-1</sup> ) | Conc. (mg·L <sup>-1</sup> ) | LOQ (mg·L <sup>-1</sup> ) |
| <i>Cyanidin 3-O-Glc-(epi)cat</i>                       | 0.001 ± 0.002               | 0.02                      | 0.02 ± 0.02                 | 0.0008                    | n.d.                        | 0.002                     | n.d.                        | 0.0009                    |
| <i>Petunidin 3-O-Glc-(epi)cat</i>                      | 0.01 ± 0.004                | 0.07                      | 0.009 ± 0.01                | 0.06                      | n.d.                        | 0.0007                    | n.d.                        | 0.004                     |
| <i>Peonidin 3-O-Glc-(epi)cat</i>                       | 0.04 ± 0.02                 | 0.002                     | 0.03 ± 0.02                 | 0.002                     | n.d.                        | 0.002                     | 0.003 ± 0.005               | 0.006                     |
| <i>Malvidin 3-O-Glc-(epi)cat (2 isomers)</i>           | 0.34 ± 0.04                 | 0.02                      | 0.14 ± 0.02                 | 0.02                      | 0.0007 ± 0.0002             | 0.003                     | 0.004 ± 0.003               | 0.002                     |
| <i>Malvidin 3-O-coumaroyl-Glc-(epi)cat (2 isomers)</i> | 0.001 ± 0.002               | 0.006                     | 0.0013 ± 0.0006             | 0.006                     | n.d.                        | 0.0006                    | n.d.                        | 0.003                     |
| <i>(epi)cat-delphinidin 3-O-Glc A-F bicyclic</i>       | n.d.                        | 0.004                     | n.d.                        | 0.005                     | n.d.                        | 0.003                     | n.d.                        | 0.004                     |
| <i>(epi)cat-cyanidin 3-O-Glc A-F bicyclic</i>          | n.d.                        | 0.008                     | n.d.                        | 0.002                     | n.d.                        | 0.004                     | n.d.                        | 0.004                     |
| <i>(epi)cat-petunidin 3-O-Glc A-F bicyclic</i>         | 0.001 ± 0.002               | 0.002                     | 0.002 ± 0.002               | 0.002                     | n.d.                        | 0.003                     | n.d.                        | 0.003                     |
| <i>(epi)cat-peonidin 3-O-Glc A-F bicyclic</i>          | 0.003 ± 0.004               | 0.002                     | n.d.                        | 0.003                     | n.d.                        | 0.005                     | n.d.                        | 0.003                     |
| <i>(epi)cat-malvidin 3-O-Glc A-F bicyclic</i>          | 0.005 ± 0.005               | 0.05                      | 0.01 ± 0.02                 | 0.03                      | 0.001 ± 0.002               | 0.03                      | n.d.                        | 0.003                     |
| <i>Caftaric-peonidin 3-O-Glc (2 isomers)</i>           | 0.008 ± 0.006               | 0.003                     | n.d.                        | 0.02                      | n.d.                        | 0.001                     | 0.001 ± 0.003               | 0.002                     |
| <i>Caftaric-malvidin 3-O-Glc (2 isomers)</i>           | 0.019 ± 0.007               | 0.003                     | 0.012 ± 0.004               | 0.002                     | n.d.                        | 0.002                     | 0.007 ± 0.003               | 0.002                     |
| <i>Coutaric-malvidin 3-O-Glc (2 isomers)</i>           | n.d.                        | 0.003                     | n.d.                        | 0.003                     | n.d.                        | 0.002                     | n.d.                        | 0.004                     |
| <i>Pyranodelphinidin 3-O-Glc</i>                       | n.d.                        | 0.03                      | 0.002 ± 0.003               | 0.003                     | 0.0003 ± 0.0006             | 0.004                     | n.d.                        | 0.03                      |
| <i>Pyranocyanidin 3-O-Glc</i>                          | n.d.                        | 0.007                     | n.d.                        | 0.04                      | n.d.                        | 0.04                      | n.d.                        | 0.01                      |
| <i>Pyranopetunidin 3-O-Glc</i>                         | 0.002 ± 0.002               | 0.0006                    | 0.006 ± 0.002               | 0.01                      | 0.0003 ± 0.0006             | 0.01                      | n.d.                        | 0.003                     |
| <i>Pyranopeonidin 3-O-Glc</i>                          | 0.003 ± 0.002               | 0.006                     | 0.006 ± 0.002               | 0.003                     | 0.0061 ± 0.0006             | 0.002                     | 0.0009 ± 0.0002             | 0.002                     |
| <i>Pyranomalvidin 3-O-Glc (vitisin B)</i>              | 0.0384 ± 0.001              | 0.02                      | 0.181 ± 0.006               | 0.02                      | 0.048 ± 0.004               | 0.004                     | 0.005 ± 0.002               | 0.002                     |
| <i>Carboxypyranodelphinidin 3-O-Glc</i>                | 0.001 ± 0.002               | 0.02                      | 0.011 ± 0.007               | 0.03                      | 0.001 ± 0.001               | 0.02                      | 0.001 ± 0.002               | 0.02                      |
| <i>Carboxypyranocyanidin 3-O-Glc</i>                   | 0.002 ± 0.004               | 0.02                      | 0.003 ± 0.002               | 0.02                      | 0.001 ± 0.002               | 0.0005                    | n.d.                        | 0.003                     |
| <i>Carboxypyranopetunidin 3-O-Glc</i>                  | 0.002 ± 0.002               | 0.02                      | 0.004 ± 0.004               | 0.02                      | 0.002 ± 0.002               | 0.004                     | 0.002 ± 0.004               | 0.002                     |
| <i>Carboxypyranopeonidin 3-O-Glc</i>                   | 0.013 ± 0.004               | 0.002                     | 0.0046 ± 0.0005             | 0.0003                    | 0.003 ± 0.0002              | 0.0005                    | 0.0017 ± 0.0007             | 0.0004                    |
| <i>Carboxypyranomalvidin 3-O-Glc (vitisin A)</i>       | 0.2 ± 0.02                  | 0.003                     | 0.17 ± 0.02                 | 0.005                     | 0.06 ± 0.02                 | 0.002                     | 0.012 ± 0.004               | 0.0003                    |
| <i>Pyranodelphinidin 3-O-acetyl-Glc</i>                | n.d.                        | 0.0005                    | n.d.                        | 0.0003                    | n.d.                        | 0.005                     | n.d.                        | 0.0002                    |
| <i>Pyranocyanidin 3-O-acetyl-Glc</i>                   | 0.0002 ± 0.0005             | 0.0009                    | n.d.                        | 0.0009                    | n.d.                        | 0.0006                    | n.d.                        | 0.0005                    |



Table S1. Cont.

|                                                        | 9                           |                           | 10                          |                           | 11                          |                           | 12                          |                           |
|--------------------------------------------------------|-----------------------------|---------------------------|-----------------------------|---------------------------|-----------------------------|---------------------------|-----------------------------|---------------------------|
|                                                        | Conc. (mg·L <sup>-1</sup> ) | LOQ (mg·L <sup>-1</sup> ) | Conc. (mg·L <sup>-1</sup> ) | LOQ (mg·L <sup>-1</sup> ) | Conc. (mg·L <sup>-1</sup> ) | LOQ (mg·L <sup>-1</sup> ) | Conc. (mg·L <sup>-1</sup> ) | LOQ (mg·L <sup>-1</sup> ) |
| <i>Pyranopetunidin 3-O-acetyl-Glc</i>                  | n.d.                        | 0.0005                    | n.d.                        | 0.0005                    | n.d.                        | 0.0007                    | n.d.                        | 0.003                     |
| <i>Pyranopeonidin 3-O-acetyl-Glc</i>                   | 0.002 ± 0.004               | 0.0008                    | 0.0003 ± 0.0005             | 0.003                     | n.d.                        | 0.0006                    | n.d.                        | 0.0005                    |
| <i>Pyranomalvidin 3-O-acetyl-Glc</i>                   | 0.009 ± 0.005               | 0.0008                    | 0.01 ± 0.006                | 0.0004                    | 0.0002 ± 0.0003             | 0.0009                    | n.d.                        | 0.0007                    |
| <i>Carboxypyranodelphinidin 3-O-acetyl-Glc</i>         | n.d.                        | 0.02                      | 0.0003 ± 0.0005             | 0.0007                    | n.d.                        | 0.002                     | n.d.                        | 0.0006                    |
| <i>Carboxypyranocyanidin 3-O-acetyl-Glc</i>            | 0.0004 ± 0.0003             | 0.0004                    | 0.0008 ± 0.0008             | 0.0009                    | n.d.                        | 0.0005                    | n.d.                        | 0.002                     |
| <i>Carboxypyranopetunidin 3-O-acetyl-Glc</i>           | n.d.                        | 0.0004                    | n.d.                        | 0.008                     | n.d.                        | 0.0007                    | n.d.                        | 0.0003                    |
| <i>Carboxypyranopeonidin 3-O-acetyl-Glc</i>            | 0.005 ± 0.005               | 0.02                      | n.d.                        | 0.008                     | n.d.                        | 0.002                     | 0.001 ± 0.002               | 0.003                     |
| <i>Carboxypyranomalvidin 3-O-acetyl-Glc</i>            | 0.08 ± 0.03                 | 0.02                      | 0.007 ± 0.01                | 0.001                     | 0.0005 ± 0.0005             | 0.002                     | 0.0004 ± 0.0008             | 0.0006                    |
| <i>Pyranopetunidin 3-O-coumaroyl-Glc</i>               | n.d.                        | 0.003                     | n.d.                        | 0.002                     | n.d.                        | 0.0004                    | n.d.                        | 0.0008                    |
| <i>Pyranopeonidin 3-O-coumaroyl-Glc</i>                | 0.001 ± 0.001               | 0.0005                    | 0.005 ± 0.005               | 0.0005                    | n.d.                        | 0.003                     | n.d.                        | 0.0007                    |
| <i>Pyranomalvidin 3-O-coumaroyl-Glc</i>                | 0.003 ± 0.003               | 0.0007                    | 0.041 ± 0.007               | 0.002                     | n.d.                        | 0.0008                    | 0.002 ± 0.003               | 0.0007                    |
| <i>Carboxypyranopetunidin 3-O-coumaroyl-Glc</i>        | n.d.                        | 0.0007                    | n.d.                        | 0.002                     | n.d.                        | 0.0007                    | n.d.                        | 0.004                     |
| <i>Carboxypyranopeonidin 3-O-coumaroyl-Glc</i>         | 0.002 ± 0.004               | 0.001                     | 0.003 ± 0.004               | 0.0005                    | n.d.                        | 0.001                     | n.d.                        | 0.0005                    |
| <i>Carboxypyranomalvidin 3-O-coumaroyl-Glc</i>         | 0.009 ± 0.008               | 0.005                     | 0.012 ± 0.004               | 0.002                     | 0.004 ± 0.004               | 0.0004                    | 0.003 ± 0.005               | 0.003                     |
| <i>p-hydroxyphenylpyranopeonidin 3-O-Glc</i>           | 0.018 ± 0.002               | 0.008                     | 0.006 ± 0.003               | 0.002                     | 0.021 ± 0.004               | 0.0005                    | 0.015 ± 0.002               | 0.0003                    |
| <i>p-hydroxyphenylpyranomalvidin 3-O-Glc</i>           | 0.26 ± 0.03                 | 0.004                     | 0.25 ± 0.03                 | 0.0003                    | 0.12 ± 0.03                 | 0.0003                    | 0.11 ± 0.04                 | 0.0002                    |
| <i>p-hydroxyphenylpyranopeonidin 3-O-acetyl-Glc</i>    | 0.012 ± 0.005               | 0.0003                    | 0.002 ± 0.002               | 0.0002                    | n.d.                        | 0.0004                    | 0.005 ± 0.004               | 0.0003                    |
| <i>p-hydroxyphenylpyranomalvidin 3-O-acetyl-Glc</i>    | 0.08 ± 0.02                 | 0.0002                    | 0.01 ± 0.003                | 0.002                     | 0.0005 ± 0.0009             | 0.0002                    | 0.028 ± 0.007               | 0.0003                    |
| <i>p-hydroxyphenylpyranopeonidin 3-O-coumaroyl-Glc</i> | 0.002 ± 0.001               | 0.0003                    | 0.01 ± 0.02                 | 0.008                     | n.d.                        | 0.0003                    | 0.013 ± 0.003               | 0.0006                    |



Table S1. *Cont.*

|                                     |                       | 9                           |                           | 10                          |                           | 11                          |                           | 12                          |                           |
|-------------------------------------|-----------------------|-----------------------------|---------------------------|-----------------------------|---------------------------|-----------------------------|---------------------------|-----------------------------|---------------------------|
|                                     |                       | Conc. (mg·L <sup>-1</sup> ) | LOQ (mg·L <sup>-1</sup> ) | Conc. (mg·L <sup>-1</sup> ) | LOQ (mg·L <sup>-1</sup> ) | Conc. (mg·L <sup>-1</sup> ) | LOQ (mg·L <sup>-1</sup> ) | Conc. (mg·L <sup>-1</sup> ) | LOQ (mg·L <sup>-1</sup> ) |
| Anthocyanins                        | <i>Unknown "551"</i>  | 0.0005 ± 0.0003             | 0.003                     | 0.0004 ± 0.0003             | 0.04                      | 0.002 ± 0.003               | 0.0007                    | n.d.                        | 0.002                     |
|                                     | <i>Unknown "581"</i>  | 0.024 ± 0.006               | 0.003                     | 0.072 ± 0.007               | 0.003                     | 0.006 ± 0.004               | 0.02                      | 0.007 ± 0.007               | 0.004                     |
|                                     | <i>Unknown "1095"</i> | n.d.                        | 0.02                      | n.d.                        | 0.02                      | 0.011 ± 0.006               | 0.02                      | n.d.                        | 0.02                      |
|                                     | <i>Unknown "1099"</i> | 0.00135 ± 0.00003           | 0.002                     | 0.001 ± 0.002               | 0.03                      | n.d.                        | <0.002                    | n.d.                        | <0.002                    |
| Others (aminoacids<br>and alcohols) | <i>Tyrosine</i>       | 9 ± 0.08                    | 0.6                       | 6.59 ± 0.07                 | 0.3                       | 14 ± 0.3                    | 0.9                       | 10.92 ± 0.07                | 1                         |
|                                     | <i>Tyrosol</i>        | 16.07 ± 0.34                | 4                         | 8 ± 0.2                     | 3                         | 7.3 ± 0.2                   | 0.6                       | 7.1 ± 0.2                   | 0.7                       |
|                                     | <i>Hydroxytyrosol</i> | 0.95 ± 0.08                 | 0.03                      | 0.2 ± 0.03                  | 0.05                      | 0.82 ± 0.08                 | 0.04                      | 0.1248 ± 0.0005             | 0.04                      |
|                                     | <i>Tryptophol</i>     | 1.39 ± 0.28                 | 0.4                       | 4.4 ± 0.4                   | 0.3                       | n.d.                        | 0.4                       | 0.4 ± 0.3                   | 0.34                      |
|                                     | <i>Tryptophan</i>     | 1.65 ± 0.38                 | 0                         | 2.03 ± 0.02                 | 0                         | n.d.                        | 0                         | 1 ± 0.2                     | 0                         |

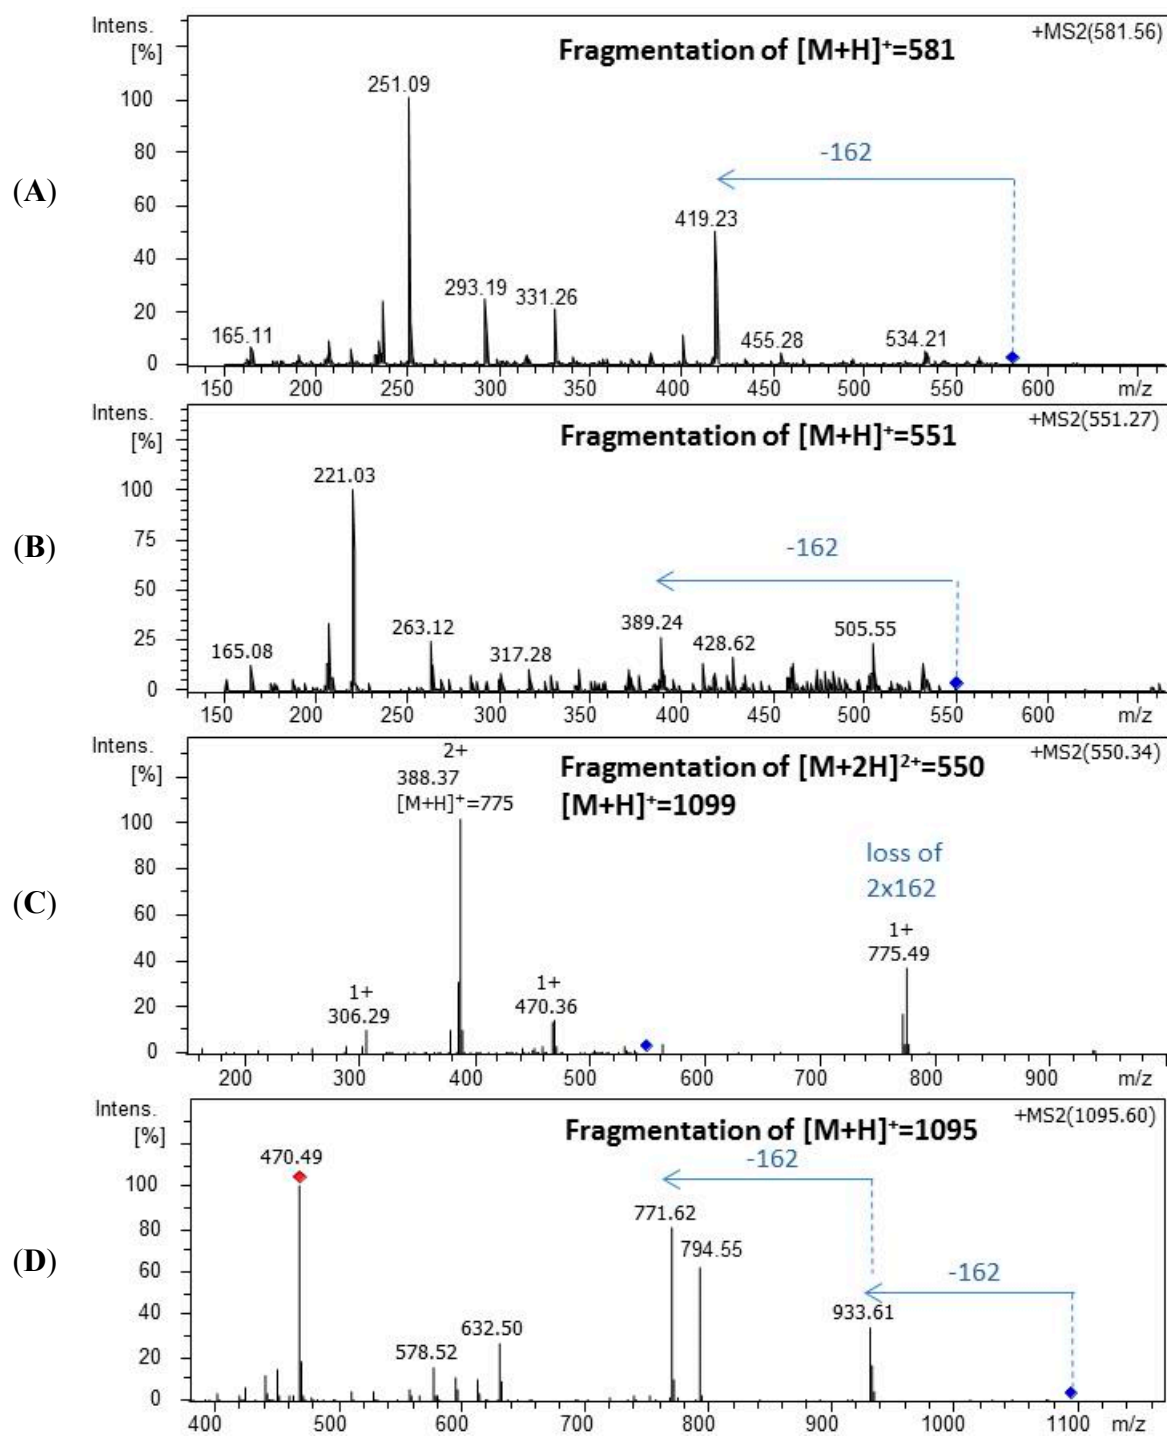

**Figure S1.** Ion trap MS/MS fragmentation spectra (ESI+ mode) of (A) “unknown581”, (B) “unknown551”, (C) “unknown1099” (from the doubly charged parent ion at  $m/z$  550 Th) and (D) “unknown1095”.
